# Supplementary material for: Engineering domain-inlaid SaCas9 adenine base editors with reduced RNA off-targets and increased on-target DNA editing
Source: PubMed Central journal article supplement (PMC7519688; doi:10.1038/s41467-020-18715-y), 2020-09-25

## SUPPLEMENTARY INFORMATION

### **Engineering domain-inlaid SaCas9 adenine base editors with reduced RNA off-targets and increased on-target DNA editing**

Minh Thuan Nguyen Tran,<sup>1</sup> Mohd Khairul Nizam Mohd Khalid,<sup>1</sup> Qi Wang,<sup>1</sup> Jacqueline K R Walker,<sup>1</sup> Grace E Lidgerwood,<sup>2,3</sup> Kimberley L Dilworth,<sup>4</sup> Leszek Lisowski,<sup>4,5</sup> Alice Pébay,<sup>2,3</sup> Alex W Hewitt.<sup>1,6</sup>

<sup>1</sup> Menzies Institute for Medical Research, School of Medicine, University of Tasmania, Tasmania, Australia

<sup>2</sup> Department of Surgery, The University of Melbourne, Victoria, Australia

<sup>3</sup> Department of Anatomy and Neuroscience, The University of Melbourne, Victoria, Australia

<sup>4</sup> Translational Vectorology Research Unit, Children's Medical Research Institute, Faculty of Medicine and Health, The University of Sydney, Westmead, Australia

<sup>5</sup> Military Institute of Hygiene and Epidemiology, The Biological Threats Identification and Countermeasure Centre, Puławy, Poland

<sup>6</sup> Centre for Eye Research Australia, The University of Melbourne, Victoria, Australia

**Supplementary Table 1**

**Plasmid description and their corresponding Addgene deposit number for all constructs used in this work.**

| Plasmid Name                      | Addgene ID | Description                                                                                                                                                                                    |
|-----------------------------------|------------|------------------------------------------------------------------------------------------------------------------------------------------------------------------------------------------------|
| PX552-CMV-mCherry-U6-SpCas9       | 87916      | sgRNA expressing AAV construct with a mCherry reporter driven by hSyn promoter.                                                                                                                |
| PX552-CMV-mCherry-U6-SaCas9       | 107053     | Backbone vector for cloning in target sgRNA for use with SaCas9                                                                                                                                |
| 1010-AIDx-CP                      | 135340     | Circular permutant of nSpyCas9 at amino acid position 1010 encoding truncated human cytosine deaminase, hAIDx, at the C-terminus.                                                              |
| 1029-AIDx-CP                      | 135341     | Circular permutant of nSpyCas9 at amino acid position 1029 encoding truncated human cytosine deaminase, hAIDx, at the C-terminus.                                                              |
| 1058-AIDx-CP                      | 135342     | Circular permutant of nSpyCas9 at amino acid position 1058 encoding truncated human cytosine deaminase, hAIDx, at the C-terminus.                                                              |
| SpyCas9-AIDx                      | 135343     | Wildtype nSpyCas9 encoding truncated human cytosine deaminase, hAIDx, at the C-terminus.                                                                                                       |
| AIDx-ID-202                       | 135344     | Intradomain insertion of truncated human cytosine deaminase, hAIDx, at position 202 of nSpyCas9                                                                                                |
| AIDx-ID-208                       | 135345     | Intradomain insertion of truncated human cytosine deaminase, hAIDx, at position 208 of nSpyCas9                                                                                                |
| AIDx-ID-468                       | 135346     | Intradomain insertion of truncated human cytosine deaminase, hAIDx, at position 468 of nSpyCas9                                                                                                |
| AIDx-ID-1058                      | 135347     | Intradomain insertion of truncated human cytosine deaminase, hAIDx, at position 1058 of nSpyCas9 with uracil DNA glycosylase inhibitor (UGI) at the C terminus                                 |
| BE3-NLS-NLS-P2A-BLAST             | 135348     | BE3 (Base editor generation three) with dual C-terminal NLS in a single operon encoding P2A blasticidine resistance                                                                            |
| S2 1058 AIDx no UGI               | 135349     | Intradomain insertion of truncated human cytosine deaminase, hAIDx, at position 1058 of nSpyCas9                                                                                               |
| S2 1058 APOBEC3 no UGI            | 135350     | Intradomain insertion of rat cytosine deaminase, rAPOBEC3, at position 1058 of nSpyCas9                                                                                                        |
| S2 1058 APOBEC3 with UGI          | 135351     | Intradomain insertion of truncated rat cytosine deaminase, rAPOBEC3, at position 1058 of nSpyCas9 with uracil DNA glycosylase inhibitor (UGI) at the C terminus                                |
| S1 1029 CP APOBEC3 no UGI         | 135352     | Circular permutant of nSpyCas9 at amino acid position 1029 encoding rat cytosine deaminase, rAPOBEC3 at the N-terminus                                                                         |
| S1 1029 CP APOBEC3 with UGI       | 135353     | Circular permutant of nSpyCas9 at amino acid position 1029 encoding rat cytosine deaminase, rAPOBEC3 at the N-terminus with uracil DNA glycosylase inhibitor (UGI) at the C terminus           |
| S1 1029 AIDx with UGI             | 135354     | Circular permutant of nSpyCas9 at amino acid position 1029 encoding truncated human cytosine deaminase, hAIDx, at the C-terminus with uracil DNA glycosylase inhibitor (UGI) at the C terminus |
| pCMV-ABEMAX-NLS-P2A_BLAST         | 135355     | ABEMax (wildtype Tada monomer coupled with evolved Tada monomer) with dual C-terminal NLS in a single operon encoding P2A blasticidine resistance                                              |
| S2 1058 ABEMax                    | 135356     | Intradomain insertion of ABEMax (wildtype Tada monomer coupled with evolved Tada monomer) at position 1058 of nSpyCas9                                                                         |
| S1 1029 CP ABEMax strategy 1      | 135357     | Circular permutant of nSpyCas9 at amino acid position 1029 encoding ABEMax (wildtype Tada monomer coupled with evolved Tada monomer) at the N-terminus                                         |
| S1 1029 CP ABEMax strategy 2      | 135358     | Circular permutant of nSpyCas9 at amino acid position 1029 encoding de-coupled ABEMax (wildtype Tada monomer at N terminus, evolved Tada monomer at C terminus)                                |
| S1 1029 CP ABEMax strategy 3      | 135359     | Circular permutant of nSpyCas9 at amino acid position 1029 encoding ABEMax (wildtype Tada monomer coupled with evolved Tada monomer) at the C-terminus                                         |
| S1 1029 miniABEMax V82G strategy1 | 135360     | Circular permutant of nSpyCas9 at amino acid position 1029 encoding miniABEMax (evolved Tada monomer with V82G) at the N-terminus                                                              |
| S2 1058 V82G ABEMax               | 135361     | Intradomain insertion of miniABEMax (evolved Tada monomer with V82G) at position 1058 of                                                                                                       |

|                                                             |        |                                                                                                                                            |
|-------------------------------------------------------------|--------|--------------------------------------------------------------------------------------------------------------------------------------------|
|                                                             |        | nSpyCas9                                                                                                                                   |
| miniABEMax V82G wt                                          | 135362 | nSpyCas9 with N-terminal miniABEMax (V82G)                                                                                                 |
| S1 1029 V82G ABEMax Strategy 3                              | 135363 | Circular permutant of nSpyCas9 at amino acid position 1029 encoding miniABEMax (evolved Tada monomer with V82G) at the N-terminus          |
| ABEMax nSaCas9                                              | 135364 | SaCas9 nickase (D10A) with ABEMax at the N terminus                                                                                        |
| miniABEMax V82G nSaCas9                                     | 135365 | SaCas9 nickase (D10A) with single evolved TadA monomer (ABEMax) with a V82G substitution                                                   |
| nSaCas9 D127 miniABEMax V82G                                | 135366 | Intradomain insertion of single evolved TadA monomer (V82G) at the specified position (D127 )                                              |
| nSaCas9 D126 miniABEMax V82G                                | 135367 | Intradomain insertion of single evolved TadA monomer (V82G) at the specified position (D126 )                                              |
| nSaCas9 E739 miniABEMax V82G                                | 135368 | Intradomain insertion of single evolved TadA monomer (V82G) at the specified position (E739 )                                              |
| nSaCas9 E743 miniABEMax V82G                                | 135369 | Intradomain insertion of single evolved TadA monomer (V82G) at the specified position (E743 )                                              |
| nSaCas9 E745 miniABEMax V82G                                | 135370 | Intradomain insertion of single evolved TadA monomer (V82G) at the specified position (E745 )                                              |
| nSaCas9 F733 miniABEMax V82G                                | 135371 | Intradomain insertion of single evolved TadA monomer (V82G) at the specified position (F733 )                                              |
| nSaCas9 N730 miniABEMax V82G                                | 135372 | Intradomain insertion of single evolved TadA monomer (V82G) at the specified position (N730 )                                              |
| nSaCas9 E125 miniABEMax V82G                                | 135373 | Intradomain insertion of single evolved TadA monomer (V82G) at the specified position (E125 )                                              |
| nSaCas9 E131 miniABEMax V82G                                | 135374 | Intradomain insertion of single evolved TadA monomer (V82G) at the specified position (E131 )                                              |
| nSaCas9 L132 miniABEMax V82G                                | 135375 | Intradomain insertion of single evolved TadA monomer (V82G) at the specified position (L132 )                                              |
| nSaCas9 N130 miniABEMax V82G                                | 135376 | Intradomain insertion of single evolved TadA monomer (V82G) at the specified position (N130 )                                              |
| nSaCas9 E735 miniABEMax V82G                                | 135377 | Intradomain insertion of single evolved TadA monomer (V82G) at the specified position (E735 )                                              |
| nSaCas9 K736 miniABEMax V82G                                | 135378 | Intradomain insertion of single evolved TadA monomer (V82G) at the specified position (K736 )                                              |
| nSaCas9 I744 miniABEMax V82G                                | 135379 | Intradomain insertion of single evolved TadA monomer (V82G) at the specified position (I744 )                                              |
| nSaCas9 G129 miniABEMax V82G                                | 135380 | Intradomain insertion of single evolved TadA monomer (V82G) at the specified position (G129 )                                              |
| nSaCas9 H119 miniABEMax V82G                                | 135381 | Intradomain insertion of single evolved TadA monomer (V82G) at the specified position (H119 )                                              |
| nSaCas9 M732 miniABEMax V82G                                | 135382 | Intradomain insertion of single evolved TadA monomer (V82G) at the specified position (M732 )                                              |
| nSaCas9 M741 miniABEMax V82G                                | 135383 | Intradomain insertion of single evolved TadA monomer (V82G) at the specified position (M741 )                                              |
| nSaCas9 N120 miniABEMax V82G                                | 135384 | Intradomain insertion of single evolved TadA monomer (V82G) at the specified position (N120 )                                              |
| nSaCas9 P742 miniABEMax V82G                                | 135385 | Intradomain insertion of single evolved TadA monomer (V82G) at the specified position (P742 )                                              |
| nSaCas9 Q731 miniABEMax V82G                                | 135386 | Intradomain insertion of single evolved TadA monomer (V82G) at the specified position (Q731 )                                              |
| nSaCas9 Q737 miniABEMax V82G                                | 135387 | Intradomain insertion of single evolved TadA monomer (V82G) at the specified position (Q737 )                                              |
| nSaCas9 S740 miniABEMax V82G                                | 135388 | Intradomain insertion of single evolved TadA monomer (V82G) at the specified position (S740 )                                              |
| nSaCas9 T128 miniABEMax V82G                                | 135389 | Intradomain insertion of single evolved TadA monomer (V82G) at the specified position (T128 )                                              |
| nSaCas9 G129 AIDx                                           | 140596 | Intradomain insertion of hAIDx at the specified position (G129)                                                                            |
| nSaCas9 I744 AIDx                                           | 140597 | Intradomain insertion of hAIDx at the specified position (I744)                                                                            |
| nSaCas9 N730 AIDx                                           | 140598 | Intradomain insertion of hAIDx at the specified position (N730)                                                                            |
| Px601<br>SCP1_nSaCas9_I744_miniABEMax_V82G hU6_sgRNA_site11 | 140599 | AAV construct expressing nSaCas9_I744_miniABEMax_V82G driven by a SCP1 promoter and sgRNA targeting "ABE site 11" driven by a hU6 promoter |
| Px601<br>SCP1_nSaCas9_I744_miniABEMax_V82G hU6_sgRNA_LacZ   | 140600 | AAV construct expressing nSaCas9_I744_miniABEMax_V82G driven by a SCP1 promoter and sgRNA targeting LacZ driven by a hU6 promoter          |

**Supplementary Table 2.**

**Reference sequence of amplicons used in analysis and an overview of oligonucleotide primer sequences for amplicon expansion and cloning methods.** sgRNA sequences are also shown with respect to their on-target editing loci.

**Amplicon Primer Sequences:**

| Description             | Oligonucleotide Sequence                                       |
|-------------------------|----------------------------------------------------------------|
| CBE-YFP FWD             | TCGTCGGCAGCGTCAGATGTGTATAAGAGACAGgcccaagatccattcgtt            |
| CBE-YFP REV             | GTCTCGTGGGCTCGGAGATGTGTATAAGAGACAGcttgccggtggtgcagat           |
| ABE-site16 FWD          | TCGTCGGCAGCGTCAGATGTGTATAAGAGACAGttctctatccacctggaatgagttt     |
| ABE-site16 REV          | GTCTCGTGGGCTCGGAGATGTGTATAAGAGACAGcagcaatccagcaacacgc          |
| ABE-YFP FWD             | TCGTCGGCAGCGTCAGATGTGTATAAGAGACAGcttcttcaagccgcatgc            |
| ABE-YFP REV             | GTCTCGTGGGCTCGGAGATGTGTATAAGAGACAGccttgatgccgttctctgc          |
| RNCF2 site1 FWD         | TCGTCGGCAGCGTCAGATGTGTATAAGAGACAGgtgagacaaacggaaactcaacc       |
| RNCF2 site1 REV         | GTCTCGTGGGCTCGGAGATGTGTATAAGAGACAGccaacatacagaagtcaggaatgcttga |
| DNAJB1 (RNA site1) FWD  | TCGTCGGCAGCGTCAGATGTGTATAAGAGACAGcatggcatgagggtctccatgg        |
| DNAJB1 (RNA site1) REV  | GTCTCGTGGGCTCGGAGATGTGTATAAGAGACAGgagctaccacccggacaag          |
| MTA2 (RNA site2) FWD    | TCGTCGGCAGCGTCAGATGTGTATAAGAGACAGgatgtgagggtgcaggtagaggg       |
| MTA2 (RNA site2) REV    | GTCTCGTGGGCTCGGAGATGTGTATAAGAGACAGgggattcgttcaagctcacagcc      |
| PTBP2 (RNA site3) FWD   | TCGTCGGCAGCGTCAGATGTGTATAAGAGACAGagattttgtaattcccaattgcatcg    |
| PTBP2 (RNA site3) REV   | GTCTCGTGGGCTCGGAGATGTGTATAAGAGACAGcctgaatagcttcttccactgttgcc   |
| SAP30BP (RNA site4) FWD | TCGTCGGCAGCGTCAGATGTGTATAAGAGACAGcagaaccccctggcagatggttc       |

|                                    |                                                                  |
|------------------------------------|------------------------------------------------------------------|
| SAP30BP (RNA site4) REV            | GTCTCGTGGGCTCGGAGATGTGTATAAGAGACAGtctcagaccagccatg<br>ggg        |
| LCMT1 (RNA site5) FWD              | TCGTCGGCAGCGTCAGATGTGTATAAGAGACAGattgccaacactcctgata<br>gctgaatg |
| LCMT1 (RNA site5) REV              | GTCTCGTGGGCTCGGAGATGTGTATAAGAGACAGgacttgcaggtctccac<br>tcccg     |
| SCAP (RNA site6) FWD               | TCGTCGGCAGCGTCAGATGTGTATAAGAGACAGgaagtagacaacacgca<br>gcctcttg   |
| SCAP (RNA site6) REV               | GTCTCGTGGGCTCGGAGATGTGTATAAGAGACAGccattgacattcgccgg<br>atggag    |
| YFP (CBE-AIDx) FWD                 | TCGTCGGCAGCGTCAGATGTGTATAAGAGACAGcgcaaatggcggtaggc<br>gtg        |
| YFP (CBE-AIDx) REV                 | GTCTCGTGGGCTCGGAGATGTGTATAAGAGACAGgaagtcgtgctgcttca<br>tgtgg     |
| SpCas9 sgRNA YFP ABE top           | ACCGgtgaaccgcatcgagctgaa                                         |
| SpCas9 sgRNA YFP ABE btm           | AACttcagctcgatcggttcacC                                          |
| SpCas9 ABE16 sgRNA top             | ACCGggaataaatcatagaatcc                                          |
| SpCas9 ABE16 sgRNA btm             | AACggattctatgatttattcccC                                         |
| SpCas9 RNF2 sgRNA top              | ACCGgtcatcttagtcattacctg                                         |
| SpCas9 RNF2 sgRNA btm              | AACcaggaatgactaagatgacC                                          |
| SaCas9 YFP sgRNA (SapI) top        | ACCGcgcgccaagatccattcgttg                                        |
| SaCas9 YFP sgRNA (SapI) bottom     | AACcaacgaatggatcttggcgcgC                                        |
| SaCas9 ABE16 sgRNA top (SapI)      | ACCGGACAAGGTTTGAAGGACAGG                                         |
| SaCas9 ABE ABE 16 sgRNA btm (SapI) | AACCCTGTCCTTCAAACCTTGTCCC                                        |
| SaCas9 RNCF2 sgRNA top (SapI)      | ACCGCATGAAACTTAAATAGAACA                                         |
| SaCas9 RNCF2 sgRNA btm (SapI)      | AACTGTTCTATTTAAGTTTTCATGC                                        |
| SaCas9 PCDH15 sgRNA top            | ACCGGGTTCaCCTCTCATTcAGATT                                        |
| SaCas9 PCDH15 sgRNA bottom         | AACAATCTGAATGAGAGGtGAACCC                                        |
| gDNA Off-Target 1 FWD (ABE11)      | TCGTCGGCAGCGTCAGATGTGTATAAGAGACAGCAGGCTGCCAACCAT<br>ACTCA        |
| gDNA Off-Target 1 REV (ABE11)      | GTCTCGTGGGCTCGGAGATGTGTATAAGAGACAGgctgattcaagtcaaac              |

|                               |                                                                |
|-------------------------------|----------------------------------------------------------------|
|                               | acagg                                                          |
| gDNA Off-Target 2 FWD (ABE11) | TCGTCGGCAGCGTCAGATGTGTATAAGAGACAGCCTGCTTACAGGACT<br>TGTGTCCA   |
| gDNA Off-Target 2 REV (ABE11) | GTCTCGTGGGCTCGGAGATGTGTATAAGAGACAGCTGAAAATGGGGC<br>AGTGGAG     |
| gDNA Off-Target 3 FWD (ABE11) | TCGTCGGCAGCGTCAGATGTGTATAAGAGACAGacctctcccactccagggtca         |
| gDNA Off-Target 3 REV (ABE11) | GTCTCGTGGGCTCGGAGATGTGTATAAGAGACAGtgcggatatagcttgcca<br>ca     |
| gDNA Off-Target 4 FWD (ABE11) | TCGTCGGCAGCGTCAGATGTGTATAAGAGACAGACCTCTTCGAGTGGG<br>CAGTG      |
| gDNA Off-Target 4 REV (ABE11) | GTCTCGTGGGCTCGGAGATGTGTATAAGAGACAGAAAGACGGTTCGAG<br>GTCGTGA    |
| gDNA Off-Target 5 FWD (ABE11) | TCGTCGGCAGCGTCAGATGTGTATAAGAGACAGctgcaagctcaaaacctg<br>a       |
| gDNA Off-Target 5 REV (ABE11) | GTCTCGTGGGCTCGGAGATGTGTATAAGAGACAGGGCATGAGGTGCA<br>TTTGTT      |
| gDNA Off-Target 6 FWD (ABE11) | TCGTCGGCAGCGTCAGATGTGTATAAGAGACAGTCTTGTGCCACTGTG<br>CATGA      |
| gDNA Off-Target 6 REV (ABE11) | GTCTCGTGGGCTCGGAGATGTGTATAAGAGACAGTGCTTCCCCTTCTG<br>GAATC      |
| gDNA Off-Target 7 FWD (ABE11) | TCGTCGGCAGCGTCAGATGTGTATAAGAGACAGTTGTTCTGCACTTTTT<br>GTTGGAA   |
| gDNA Off-Target 7 REV (ABE11) | GTCTCGTGGGCTCGGAGATGTGTATAAGAGACAGagggagtattgtgcaggg<br>cata   |
| gDNA Off-Target 8 FWD (ABE11) | TCGTCGGCAGCGTCAGATGTGTATAAGAGACAGTTCATGAGGAATTTG<br>CAACACAG   |
| gDNA Off-Target 8 REV (ABE11) | GTCTCGTGGGCTCGGAGATGTGTATAAGAGACAGCTCTTGTGGGCAGA<br>ATGTCG     |
| gDNA Off-Target 1 FWD (ABE8)  | TCGTCGGCAGCGTCAGATGTGTATAAGAGACAGCCTGGGAGTTCCTCC<br>AGACC      |
| gDNA Off-Target 1 REV (ABE8)  | GTCTCGTGGGCTCGGAGATGTGTATAAGAGACAGGTGAGCGCTGTGT<br>GTGGGTA     |
| gDNA Off-Target 2 FWD (ABE8)  | TCGTCGGCAGCGTCAGATGTGTATAAGAGACAGACTTGGGAAAAGTAA<br>AACTCAAAAA |
| gDNA Off-Target 2 REV (ABE8)  | GTCTCGTGGGCTCGGAGATGTGTATAAGAGACAGTCTTCACCGAACCA<br>GCAGTG     |
| gDNA Off-Target 3 FWD (ABE8)  | TCGTCGGCAGCGTCAGATGTGTATAAGAGACAGAAGCTGCGGTGTTGA<br>ATGGT      |
| gDNA Off-Target 3 REV (ABE8)  | GTCTCGTGGGCTCGGAGATGTGTATAAGAGACAGCACAGCTGCCACTC<br>GCTAAA     |

|                                |                                                                  |
|--------------------------------|------------------------------------------------------------------|
| gDNA Off-Target 4 FWD (ABE8)   | TCGTCGGCAGCGTCAGATGTGTATAAGAGACAGCGGAAATCTTCACCG<br>AACCA        |
| gDNA Off-Target 4 REV (ABE8)   | GTCTCGTGGGCTCGGAGATGTGTATAAGAGACAGGGGCTGCTGTCAG<br>GAGAAATC      |
| gDNA Off-Target 5 FWD (ABE8)   | TCGTCGGCAGCGTCAGATGTGTATAAGAGACAGTTGGCATTTCCAAAT<br>ACCCTCTT     |
| gDNA Off-Target 5 REV (ABE8)   | GTCTCGTGGGCTCGGAGATGTGTATAAGAGACAGTGAATGCTGGACCA<br>GGAAAG       |
| gDNA Off-Target 6 FWD (ABE8)   | TCGTCGGCAGCGTCAGATGTGTATAAGAGACAGcttctcatgctgccttct              |
| gDNA Off-Target 6 REV (ABE8)   | GTCTCGTGGGCTCGGAGATGTGTATAAGAGACAGtctcagcagcaatataa<br>acaatga   |
| gDNA Off-Target 7 FWD (ABE8)   | TCGTCGGCAGCGTCAGATGTGTATAAGAGACAGgtccaatgacaggagcaT<br>GA        |
| gDNA Off-Target 7 REV (ABE8)   | GTCTCGTGGGCTCGGAGATGTGTATAAGAGACAGGCACAAAAGCCAC<br>AAATGGA       |
| gDNA Off-Target 8 FWD (ABE8)   | TCGTCGGCAGCGTCAGATGTGTATAAGAGACAGGCCCCCTGAGCCATTA<br>AAACC       |
| gDNA Off-Target 8 REV (ABE8)   | GTCTCGTGGGCTCGGAGATGTGTATAAGAGACAGAAACAGGTGAGGG<br>CCATGAA       |
| gDNA Off-Target 9 FWD (ABE8)   | TCGTCGGCAGCGTCAGATGTGTATAAGAGACAGCAGAGACTCGGGGG<br>ACTGAA        |
| gDNA Off-Target 9 REV (ABE8)   | GTCTCGTGGGCTCGGAGATGTGTATAAGAGACAGCATGGGTCAAAG<br>GCAGAGG        |
| gDNA Off-Target 10 FWD (ABE8)  | TCGTCGGCAGCGTCAGATGTGTATAAGAGACAGaggcccatatgtgctccag<br>a        |
| gDNA Off-Target 10 REV (ABE8)  | GTCTCGTGGGCTCGGAGATGTGTATAAGAGACAGaacagagtttagaaatag<br>ccctgcat |
| gDNA Off-Target 1 FWD (SITE 1) | TCGTCGGCAGCGTCAGATGTGTATAAGAGACAGCCCTGGGCTATTTTT<br>GTCCA        |
| gDNA Off-Target 1 REV (ABE1)   | GTCTCGTGGGCTCGGAGATGTGTATAAGAGACAGTGGCCATATTCTCA<br>GCCACA       |
| gDNA Off-Target 2 FWD (ABE1)   | TCGTCGGCAGCGTCAGATGTGTATAAGAGACAGAGTCCCGACAGGCTT<br>TCCAT        |
| gDNA Off-Target 2 REV (ABE1)   | GTCTCGTGGGCTCGGAGATGTGTATAAGAGACAGAGATGGGCTTGAG<br>CGATTCA       |
| gDNA Off-Target 3 FWD (ABE1)   | TCGTCGGCAGCGTCAGATGTGTATAAGAGACAGTGCCTTATGAAGAG<br>AAGGAGGA      |
| gDNA Off-Target 3 REV (ABE1)   | GTCTCGTGGGCTCGGAGATGTGTATAAGAGACAGTTGGGTCCCTAAGC<br>CAATCC       |

|                               |                                                               |
|-------------------------------|---------------------------------------------------------------|
| gDNA Off-Target 4 FWD (ABE1)  | TCGTCGGCAGCGTCAGATGTGTATAAGAGACAGTGAAAGCTAGGCATG<br>GGTGAA    |
| gDNA Off-Target 4 REV (ABE1)  | GTCTCGTGGGCTCGGAGATGTGTATAAGAGACAGcattccaaggtcccaga<br>aa     |
| gDNA Off-Target 5 FWD (ABE1)  | TCGTCGGCAGCGTCAGATGTGTATAAGAGACAGTGAGCATTCTCTCA<br>GGTGTCC    |
| gDNA Off-Target 5 REV (ABE1)  | GTCTCGTGGGCTCGGAGATGTGTATAAGAGACAGCCCAGGAATACATC<br>CTTGGA    |
| gDNA Off-Target 6 FWD (ABE1)  | TCGTCGGCAGCGTCAGATGTGTATAAGAGACAGGCCAGGAATAATGG<br>GTTGTGA    |
| gDNA Off-Target 6 REV (ABE1)  | GTCTCGTGGGCTCGGAGATGTGTATAAGAGACAGggagtgaggaggatag<br>cat     |
| gDNA Off-Target 7 FWD (ABE1)  | TCGTCGGCAGCGTCAGATGTGTATAAGAGACAGGAATCTTGGGCACCA<br>TGGAA     |
| gDNA Off-Target 7 REV (ABE1)  | GTCTCGTGGGCTCGGAGATGTGTATAAGAGACAGTGACCAATCTCCTT<br>GATGAGGAA |
| gDNA Off-Target 8 FWD (ABE1)  | TCGTCGGCAGCGTCAGATGTGTATAAGAGACAGGCCAGACCCTTCAG<br>ACAGA      |
| gDNA Off-Target 8 REV (ABE1)  | GTCTCGTGGGCTCGGAGATGTGTATAAGAGACAGGGCATTCTGATCCC<br>AACTCCT   |
| gDNA Off-Target 9 FWD (ABE1)  | TCGTCGGCAGCGTCAGATGTGTATAAGAGACAGTGGGGCCACTCAGA<br>GTTGAT     |
| gDNA Off-Target 9 REV (ABE1)  | GTCTCGTGGGCTCGGAGATGTGTATAAGAGACAGgcctcttcaggcaaccct<br>ct    |
| gDNA Off-Target 10 FWD (ABE1) | TCGTCGGCAGCGTCAGATGTGTATAAGAGACAGTTCAGCCTCTGACA<br>ATAAGCA    |
| gDNA Off-Target 10 REV (ABE1) | GTCTCGTGGGCTCGGAGATGTGTATAAGAGACAGGGCAGGTTTGTAGC<br>TTTCTTGC  |

**sgRNA sequences:**

| Description                     | sgRNA Sequence        |
|---------------------------------|-----------------------|
| SpCas9 ABE16 target guide (ABE) | GGGAATAAATCATAGAATCC  |
| SaCas9 ABE16 target guide (ABE) | GGACAAGGTTTGAAGGACAGG |
| SpCas9 YFP target guide (ABE)   | GTGAACCGCATCGAGCTGAA  |
| SaCas9 RNF2 target guide (ABE)  | CATGAAAACCTAAATAGAACA |
| SpCas9 YFP target guide (CBE)   | CCGTCCAGCTCGACCAGGAT  |



|                                        |                        |
|----------------------------------------|------------------------|
| SpCas9 RNF2 target guide (CBE)         | GTCATCTTAGTCATTACCTG   |
| SaCas9 PCDH15 target guide (ABE)       | GGTTCACCTCTCATTAGATT   |
| SaCas9 ABE1 target guide (ABE)         | CTGAATAGCTGCAAACAAGTG  |
| SaCas9 ABE3 target guide (ABE)         | CGGTGAACTCAGAGATAGAAA  |
| SaCas9 ABE4 target guide (ABE)         | TGAAGGGAAATCTGGAGCAAA  |
| SaCas9 ABE5 target guide (ABE/CBE)     | CTCAGAAAGCTCAAAGTGTGA  |
| SaCas9 ABE7 target guide (ABE)         | AAGAATACTAAGCATAGACTC  |
| SaCas9 ABE8 target guide (ABE)         | TGGGCTTTAGGAACAGGGGTA  |
| SaCas9 ABE9 target guide (ABE/CBE)     | AACAACAAAACGGACAGTGAA  |
| SaCas9 ABE11 target guide (ABE)        | GGGAGCTAGACAAAATGGAGT  |
| SaCas9 HEKsite4 target guide (ABE/CBE) | GGCGAGGCAGAGGGTCCAAG   |
| SaCas9 ABE17 target guide (ABE)        | ATTTACAGCCTGGCCTTTGGGG |
| SaCas9 ABE18 target guide (ABE)        | GGAGAGAAAGAGAAGTTGATTG |
| SaCas9 ABE19 target guide (ABE)        | GTGTCAGGTAATGTGCTAAACA |
| SaCas9 ABE21 target guide (ABE)        | GCTGTTGCATGAGGAAAGGGAC |
| SaCas9 ABE27 target guide (ABE)        | GGGAGCTCAAGCCTGATTCCAA |

**On-Target sequence used for alignment of amplified sequences.**

| Description | gDNA Sequence                                                                                                                                                                                                                                        |
|-------------|------------------------------------------------------------------------------------------------------------------------------------------------------------------------------------------------------------------------------------------------------|
| ABE16       | CAGCAATCCAGCAACACGCGGGGAGGTGGAGAGAGGATGTTTTGCTTATCCAGAAAA<br>GGGAGTGATTGCTTCCAGGGCCTCAGGGGAATAAATCATAGAATCCTGGACAAGGT<br>TTGAAGGACAGGTAGGATTTGGGTGGGTGGAGGAGGGTGCATGGGGTCAGAATTGT<br>AACCGAAAACCTATTCCAGGTGGATAGAGC                                  |
| RNF2        | CCAACATACAGAAGTCAGGAATGCTTGAATATAAATTTATTATTACTCTATGTTCTATTT<br>AAGTTTTTCATGTTCTAAAAATGTATCCCAGTTTACACGTCTCATATGCCCTTGGCAGTC<br>ATCTTAGTCATTACCTGAGGTGTTGTTGTAACCTCATATAAACTGAGTTCCCATGTTTTG<br>CTTAATGGTTGAGTTCCGTTTGTCTGCAC                        |
| YFP (ABE)   | CTTCTTCAAGTCCGCCATGCCCGAAGGCTACGTCCAGGAGCGCACCATCTTCTTCAAGG<br>ACGACGGCAACTACAAGACCCGCGCCGAGGTGAAGTTCGAGGGCGACACCCTGGTGA<br>ACCGCATCGAGCTGAAGGGCATCGACTTCAAGGAGGACGGCAACATCCTGGGGCACA<br>AGCTGGAGTACAACACTACAACAGCCACAACGTCTATATCATGGCCGACAAGCAGAAGA |

|                    |                                                                                                                                                                                                                                                                                                                                                                                                                                                                                                                                        |
|--------------------|----------------------------------------------------------------------------------------------------------------------------------------------------------------------------------------------------------------------------------------------------------------------------------------------------------------------------------------------------------------------------------------------------------------------------------------------------------------------------------------------------------------------------------------|
|                    | ACGGCATCAAGG                                                                                                                                                                                                                                                                                                                                                                                                                                                                                                                           |
| YFP (CBE)          | GCGCCAAGATCCATTTCGTTGGGGGATCCACCGGTCGCCACCTTGGTGAGCAAGGGCG<br>AGGAGCTGTTACCGGGGTGGTGCCATCCTGGTCGAGCTGGACGGCGACGTAACG<br>GCCACAAGTTCAGCGTGTCCGGCGAGGGCGAGGGCGATGCCACCTACGGCAAGCTGA<br>CCCTGAAGTTCATCTGCACCACCGGCAAG                                                                                                                                                                                                                                                                                                                     |
| YFP (CBE-AIDx)     | CGCAAATGGGCGGTAGGCGTGTACGGTGGGAGGTCTATATAAGCAGAGCTCTCTGGC<br>TAACTAGAGAACCCACTGCTTACTGGCTTATCGAAATTAATACGACTCACTATAGGGA<br>GACCCAAGCTGGCTAGCATGTCCGTCTGACGCCGCTGCTGCTGCGGGGCTTGACAG<br>GCTCGGCCCGGCGGCTCCAGTGCCGCGCGCCAAGATCCATTTCGTTGGGGGATCCAC<br>CGGTCGCCACCTTGGTGAGCAAGGGCGAGGAGCTGTTACCGGGGTGGTGCCATCC<br>TGGTCGAGCTGGACGGCGACGTAAACGGCCACAAGTTCAGCGTGTCCGGCGAGGGC<br>GAGGGCGATGCCACCTACGGCAAGCTGACCCTGAAGTTCATCTGCACCACCGGCAAG<br>CTGCCGTGCCCTGGCCACCCTCGTGACCACCTTCGGCTACGGCCTGCAGTGCTTCGC<br>CCGCTACCCCGACCACATGAAGCAGCAGACTTC |
| PCDH15 (ABE)       | CCAAGCTAATGACCGTGCCCAAATCTGAATGAGAGGtGAACCACCACCACCTCTC<br>ACAGTGGATGTTCTGGATGGAGATGACTTGGGTCCAATGTTTCTCCTTGTGCCTTGT<br>GCCAAACTCGTGATTGCCGTCCACTCACTTATCAAGCTGCCATACCTGAGTTGAGAA<br>CTCCGGAAGAACTGA                                                                                                                                                                                                                                                                                                                                   |
| ABE1 (SaCas9 site) | ACAAGACCTGGCTGAGCTAACTGTGACAGCATGTGGTAATTTCCAGCCCGCTGGCCC<br>TGTAAGGAAACTGGAACACAAAGCATAGACTGCGGGGCGGGCCAGCCTGAATAGCT<br>GCAAACAAGTGCAGAATATCTGATGATGTCATACGCACAGTTTGACAGATGGGGCTG<br>G                                                                                                                                                                                                                                                                                                                                                |
| ABE3 (SaCas9 site) | GTGGCAGGCAGATTATCATTCCCATCTTATAAATGAGTAAATTGAGGCTCAGAGGAGA<br>TGTGCCATGGCTTAGGTCTGCCGACAGCCAGTGGTTAAGTCAGAACCCGACTCAGGT<br>CAAGAAAGCAGAGACTGCCGGGGTTGGGAAGGCGGTGAACTCAGAGATAGAAACA<br>GGGTGGGTGGGGGAAGGAGGAGCTGCTGAAGGTGAGGA                                                                                                                                                                                                                                                                                                           |
| ABE4 (SaCas9 site) | GTGCTAAACAGAGAGTTACTGCTCAGACATGTAATAATAATAAACACATCAAATA<br>ACCATACCATTTTAAGCTGTAGTATTATGAAGGAAATCTGGAGCAAAGAGAATAGAC<br>TGTAGGGAAACCAGTTAAGAAATAGGACATGGAGGCTAGGTGCAGTGGCTCACGCC<br>GTAATCGCAGCACTTTGGGAGGCTGAGGCAGGTGGATCA                                                                                                                                                                                                                                                                                                            |
| ABE5 (SaCas9 site) | CATCTTACCCTCCTCAGAAGTCAAGCCTGAGCTTCCAAAATGAAGGAACTCAGGTCC<br>AGGGAAACTTTCTGTTTTGTCTGAGGGTGAAGGATGAGATAATGATGAGTCAGGGCT<br>TCAGGGAAACGAACATTTACTGATTACCTAATGTGGGGGTAGATGTGGTCCCTGCTCT<br>CAGAAAGCTCAAAGTGTGAATGAATTAAGTCAATGTGACCAGGC                                                                                                                                                                                                                                                                                                   |
| ABE7 (SaCas9 site) | GTTCCACCGCCTTGTTTACTGCTCAGTCCCCAGAATGGCAGGCACGTAGTAGGGCTC<br>AGTAAATATTTGCTGAATGAAGTTATGATCGAAAGAATACTAAGCATAGACTCCAGGA<br>TAAGGTAAGTAATATAGAGTTCACAGTGGGCAGGTCTATGCAAACCTACCCCAAAGT<br>CCGAGGAAGCTGAGAGGGCGAAGAAAGAGGCTGAG                                                                                                                                                                                                                                                                                                            |
| ABE8 (SaCas9 site) | CATACTTAAAGTAAAGCAGAAGGAATAACAGTGCCCCAAATTATCACTACCCCTGTT<br>CTAAAGCCCACCATCTTTTGTACTCAGAGTAAACAAAGCATAGACTGAGGGGTACA<br>ATCCTACTCTAGTCCCTTCTCATGCAACAGCTATGAAATAGCTGGTTAGTACTGACA                                                                                                                                                                                                                                                                                                                                                     |

|                        |                                                                                                                                                                                                                                                                                                              |
|------------------------|--------------------------------------------------------------------------------------------------------------------------------------------------------------------------------------------------------------------------------------------------------------------------------------------------------------|
|                        | GCAATTCCTTGCCACAAACAGAACCAGTTCTATAGTGAATGAACTTC                                                                                                                                                                                                                                                              |
| ABE9 (SaCas9 site)     | ATCATAGCGAGACCCTGTCTCAGCAACAACAACAAAACGGACAGTGAAGAGAGTATT<br>TGAAGGAGAGGGGAACAGGCAGCGTATTGCTTATTGCTGAGGGGCAAAGTGAAGAC<br>CAAGGATAGACTGCTGGGCTTGACAGCATGGAGGGTGTGGGGCCTAGGCAAGTG<br>CAATATTCATGTGGTGTCTATTGGGCCAAAGGTGTCTATTGGAGAGTACTC                                                                       |
| ABE11 (SaCas9 site)    | GAGGACTACTGCATCTTATTGCCTGCAAGAAAATAATTTTAATACTAAATTCTGGAAAT<br>GACATGCTACTCACTTGCTTCCATGGAAAATTATATCTTGAGATACAAGGACAGG<br>CAGCATAGACTGTGGGTATAGAATGTGGCTGGGGCTGCATGAAAAGAAAAGTTATTG<br>GGAGCTAGACAAAATGGAGTTCGAGTTCCTGTCTTTGGCAAATTGCTGTCTCTTTCTA<br>GGCCTTCATTTCC                                           |
| HEKsite4 (SaCas9 site) | TTCAAGATGGCTGACAAAGGCCGGGCTGGGTGGAAGGAAGGGAGGAAGGGCGAGG<br>CAGAGGGTCCAAAGCAGGATGACAGGCAGGGGCACCGCGGCCCGGTGGCACTG<br>CGGCTGGAGGTGGGGTTAAAGCGGAGACTCTGGTGTGTGTGACTACAGTGGGGG<br>CCCTGCCCTCTCTGAGCCCCCGCCTCCAGGCCTGTGTGTGTGTCTCCGTTCCGGTTGAA<br>AGGA                                                            |
| ABE17 (SaCas9 site)    | GGACATTTCCACCGCAAATGGCCCCTCTGGTGGTGGCCCCTTCTGCAGCGCCGGCT<br>CACCTCACGGCCCCGCCCTCCCTGCCAGCCTAGCGTTGACCCGACCCCAAAGGCCA<br>GGCTGTAATGTACCGGGAGGATTGGGTGTCTGGGCGCCTCGGGGAACCTGCCCTT<br>CTCCCCATTCCGTCTTCCGAAACCAGATCTCCACCGCACCTGGTCTGAGGTTAAAT<br>ATAGCTGCTGACCTTTCTGTA                                         |
| ABE18 (SaCas9 site)    | TGTGTATGGTGAGAGGTAGGGATCTAGTTTCATTCTTCTACATGGTTGTAACTGTAGT<br>CACCTACTGATCTATCAAACACTGGGTCATACTTCTTCTATTAACCTGTATGTTGTAC<br>CCATCAATCAACTTCTCTTTCTCTCCCCACCCCTCTACTTTCCTGACCTCTAGTAACCA<br>GCAGTCTATTCTCTATCTTCATGAGATCCACTTTTTTAGTTTCCACATGTGAGTGAGAAC<br>ATTTGATACTTGTTTTTTTTCACATTTGTTATACTCCTGGGCTGAAGTG |
| ABE19 (SaCas9 site)    | CTGCACCTAGCCTCCATGTCCTATTTCTTAACTGGTTTCCCTACAGTCTATTCTCTTTGCT<br>CCAGATTTCCCTTCATAATACTACAGCTTAAAATGGTATGGTTATTTGATGTGTTATTTA<br>TTATTATTACATGTCTGAGCAGTAACTCTCTGTTTAGCACATTACCTGACACTAAATAAA<br>TGTTTAGCAATTATAGTAATTATATGTGGAATAAATGAAAGAAAAGCAGCTGAACACT<br>TAAGGAGATAAGAAACCATGTCTCTGGATGCCACAGC         |
| ABE21 (SaCas9 site)    | CCCTGTTCTAAAGCCCACCATCTTTTGTACACTCAGAGTAAACAAAGCATAGACTGAG<br>GGGTACAATCCTACTCTAGTCCCTTTCCTCATGCAACAGCTATGAAATAGCTGGTTAGT<br>ACTGACAGCAATTCTTGCCACAAACAGAACCAGT                                                                                                                                              |
| ABE27 (SaCas9 site)    | CGCGGGCTGAAGTAGATCAAGTCCCCAGGGAGCTCAAGCCTGATTCCAAGGAGATTG<br>CCAATATTTTAGGAGGGAGTAAACATTTTCTGAAGTTTTTTGTTGTCTAAAGCCAAAA<br>ATGCACTTGCCTCCTGAGAGGACAAAGAGGAAGAGAGACGGGGAGAGGGGACAA<br>AGGAGCAGAGAC                                                                                                            |

**Off-Target sequence used for alignment of amplified sequences.**

| Description                         | gDNA / cDNA Sequence                                                                                                                                                                                                                                                    |
|-------------------------------------|-------------------------------------------------------------------------------------------------------------------------------------------------------------------------------------------------------------------------------------------------------------------------|
| DNAJB<br>(mRNA Off-Target Site 1)   | GCGCTACCACCCGGACAAGAACAAGGAGCCCCGGCGCCGAGGAGAAGTTCAAGGAG<br>ATCGCTGAGGCTACGACGTGCTCAGCGACCCGCGCAAGCGCGAGATCTTCGACCG<br>CTACGGGGAGGAAGGCCTAAAGGGGAGTGCCCCAGTGCGGTAGCGGCGGTGG<br>TGCCAATGGTACCTCTTTCAGCTACACATTCCATGGAGACCCTCATGCCATG                                     |
| MTA2<br>(mRNA Off-Target Site 2)    | GGGATTCGTTCAAGCTCACAGCCAGCAGCCAAGCGTCAGAACTAAACCCAGCTGA<br>TGCCCCAATCCTGTGGTGTGGTGCCACAAAGGATACCAGGGCCCTACGGAAGG<br>CTCTGACCCATCTGGAAATGCGGCGAGCTGCTCGCCGACCCAATTGCCCTGAAG<br>GTGAAGCCAACGCTGATTGCAGTGCGGCCCCCTGTCCCTCTACCTGCACCCTCACAT<br>C                            |
| PTBP2<br>(mRNA Off-Target Site 3)   | AGATTTTGGTAATCCCATTCATCGTTTTAAGAACTGGATCCAAAAATTTTCAA<br>AACATTTTCTCTTCTGCCACCCTTACCTATCTAATATCCCTCCATCAGTAGCAGA<br>AGAGGATCTACGAACACTGTTGCTAACACTGGGGGCACTGTGAAAGCATTTAAGT<br>TTTTCAAAGAGATCACAAAATGGCTCTTCTTCAGATGGCAACAGTGGAAGAAGCTA<br>TTCAGG                       |
| SAP30BP<br>(mRNA Off-Target Site 4) | CAGAACCCCTGGCAGATGTTCAAATCACTTGCAAGACAAGATCCAGAAGCTTTATG<br>AACGAAAGATAAAGGAGGGAATGGATATGAACTACATTATCCAAAGGAAGAAAGA<br>ATTCGGAACCCTAGCATCTACGAGAAGCTGATCCAGTTCTGTGCCATTGACGAGCT<br>TGGCACCAACTACCAAAGGATATGTTTGATCCCCATGGCTGGTCTGAGGA                                   |
| LCMT1<br>(mRNA Off-Target Site 5)   | ATTGCCAACACTCCTGATAGCTGAATGTGTGCTGGTTACATGACTCCAGAGCAGTC<br>CGCAAACCTCCTGAAGTGGGCAGCCAACAGTTTTGAGAGAGCCATGTTCATAAACT<br>ACGAACAGGTGAACATGGGTGATCGGTTTGGGCAGATCATGATTGAAAACCTGCG<br>GAGACGCCAGTGTGACCTGGCGGGAGTGGAGACCTGCAAGTC                                           |
| SCAP<br>(mRNA Off-Target Site 6)    | AGCAGACCTGAACAAGCGACTGCCCCCTGAGGCCTGCCTGCCCTCAGCCAAGCCAG<br>TGGGGCAGCCAACGCGCTACGAGCGGCAGCTGGCTGTGAGGCCGTCCACACCCCA<br>CACCATCACGTTGCAGCCGTCTTCTTCCGAAACCTGCGGCTCCCCAAGAGGCTGCG<br>TGTTGTCTACTTC                                                                        |
| gDNA ABE11 Off-Target<br>Site 1     | CAGGCTGCCAACATACTCAAGACTAATGCAAAATTTAAGCAGGGTTGAGTTTTCTGG<br>CTGAAAATATAATAACATAGGGTCAGGATGATATAAAAGCTTAGACTTCTGCAAACG<br>CACTCCATTTTGTCTATAACCTTTCAAGATTGCTTTAGTTATCTATTACCATGTAACAAA<br>CCACTAACTCTTAGTGATAAAACAAAATAACTATTTTTAATCTCTCATTTTCTGTGGTT<br>TGACTTGAATCAGC |
| gDNA ABE11 Off-Target<br>Site 2     | CCTGCTTACAGGACTTGTGTCCAAAGGCAGACTCCATTTTGTCTTACCTGCATCCCC<br>CAAAATGATGATGACACCATATACTCTGTGTTAACCTGATGAGCCACTCAGAGCCCCA<br>CATGAGGTCACAGCCTTATGTTCTCCAGGACCTGGCCAATCAATCACAGGTTTCATATA<br>GTCCTCTGAGTCATTAAGTCACCTCCACTGCCCATTTTCAG                                     |
| gDNA ABE11 Off-Target<br>Site 3     | ACCTCTCCACTCCAGGTCATTTACATCAACTCTTCTGCCTCCCTCTGTAAGTGTGA<br>TACCCTACCTGTTTTAACCTGAATTGACTGTCCCTTAGCTGAGAGAGCCAGACACACT<br>CCATTTTGGCTCCTTCACTTGCAGCCCTTACCCACCCCTTCTCAAGGACTTAACTT<br>GTGCAAGCTGACTCCAGCACATCAAAGAATGCAATTAATGGATAAGATACTGTGGC<br>AAGCTATATCCGCA        |

|                              |                                                                                                                                                                                                                                                                      |
|------------------------------|----------------------------------------------------------------------------------------------------------------------------------------------------------------------------------------------------------------------------------------------------------------------|
| gDNA ABE11 Off-Target Site 4 | ACCTCTTCGAGTGGGCAGTGAGTTCAGGCAGGGGTCACTCACCAGGCGCCCTGGCCC<br>CTGTCCAGCTGCACAGGCCCTGGAGGGAACCCAGAGAAAACGGAGTCAGCCTCTCAA<br>CCACTCCTCCGCCAGTGAGGCCGAGGGGCTGGGAGGAGCGGCTGGTCCCCGCCCC<br>ATGAGTCACCCTTGCATGGGAAGGAGGGGCCGGTGTAGGCTGGGCTGTCACGACC<br>TCGACCGTCTTT         |
| gDNA ABE11 Off-Target Site 5 | CTGCAAGCTCAAACCCTGATATGTAAATCAGAATGGCCAATTTGTTAACCTACAGCA<br>GCACATAAAAACATCAAATGTACAATGTATCGTTTACATCTGATCAGTATTTATCTCCT<br>TATAGGTAAGCTACATAAAAAGGAGTTTGCTTGGTGAGCAATGGTGGAGTGAGGCTC<br>ATGATTTGAGTATTTCAAGATGTCAACTAAGGGCACCTCAACCAAATGCACCTCATGC<br>C             |
| gDNA ABE11 Off-Target Site 6 | TCTTGTGCCACTGTGCATGATTACAGAATTACACAAAACCTCCACAAAGGATTACAAT<br>ACAAACACCTTTATATCTGCCAGATATAATAATTTAGGAAGGATTTGTATAGGGTGC<br>TATGAGTGGATCAATGATTGCTGTAGAAATGAAGTTTATGGGGAGCTAGATAATGCG<br>GAGTTAGCTTAGCTAATGGGAATGTGTAGATAGGATTCCAGGAAGGGGAAGCA                        |
| gDNA ABE11 Off-Target Site 7 | TTGTTCTGCACTTTTTGTTGGAATAAAGAATTCCAAGGCTAACTACATATAGCCTAGCT<br>CCCTCATTTTACAGATGAGCAAAAAGAGACCAGAGAAAATAAGTCCGATCAACCAGA<br>TTAAATAATACAGTAAATGAAAACCTGGATTAGAATCTAGTTTTCTAATTATCTAGTA<br>CTCTATGCCCTGCACAATACTCCCT                                                  |
| gDNA ABE11 Off-Target Site 8 | TTCATGAGGAATTTGCAACACAGTGTGTTTATTACATAAGTTAAGCTTTTTCTACTTA<br>AGGCATTTAAAAACACACTACATCTGATCTAGCTCCCCTTAAACTCTTCTACATCCTT<br>TTTTTTACCCTGTTACATAAATACATTGCTACCCATTTCCCAACGGCCTTAATCTGAT<br>ACGACATTCTGCCACAAGAG                                                       |
| gDNA ABE8 Off-Target Site 1  | CCTGGGAGTTCCTCCAGACCTGCTGCCGGAGCCAAGCTGGGAACCCACTGCCCTTCC<br>TTGCCAAGCCAAGGCTGTATGCTGGGCATTGTGCGGGAGGTAGAGGCACCCTATGG<br>GCCAGGTGGGGACACTCTAAGCCATACCCCTTTCCCTACAGGCCTGGCTACAGCAATA<br>TGGCTACCTGCCTCCCGGGGACCTACGTACCCACACACAGCGCTCAC                               |
| gDNA ABE8 Off-Target Site 2  | ACTTGGGAAAAGTAAACACTCAAAAATAATCTTAGGAAGTTTGAAAATATTTTCATGG<br>TAGTAATCTGATCACTAGGGTTACATTCTTTGATATCTACCTTTAGCATGTCATAGGT<br>TTTAGGAACAGGGGAACGGCCTCCAACAAAATCATTTTCAACCAAGTGTAGGTTGTA<br>GACATACTCAGGAACACTGCTGGTTCGGTGAAGA                                          |
| gDNA ABE8 Off-Target Site 3  | AAGCTGCGGTGTTGAATGGTGTGCTTAGACCCGGGTGCCTAGTGTGGCTCGGTGCC<br>TTACAATGAATTTGGGGAAGAGTTGTCAAACGAAACCCATGTTTCTAATGACCAGCA<br>GGTAAGTAGTTCGGCTTTTTCTTTTCATTTAATCAGTGGTAGGAAAGCGTGGCACCC<br>TGGCTATCCTGTTTTAGCGAGTGGCAGCTGTG                                               |
| gDNA ABE8 Off-Target Site 4  | CGGAAATCTCACCGAACCAGCAGTGTTCCTGAGTATGTCTACAACCTACACTTGGTT<br>GAAAATGATTTTGTGGAGGCCGTTCCCTGTTCTAAAACCTATTACATGCTAAAGG<br>CTGGCACAACCTGCCACTTATGAAGGTCGCTGGGGAAGAGGAACAGCACAGTACAGC<br>TCCCAGAAGTCCGTGGAAGAAAGGTATTTGAGGCATCCTCTGAGGAGACTGGAGATT<br>TCTCCTGACAGCAGCCC  |
| gDNA ABE8 Off-Target Site 5  | TTGGCATTTCAAATACCCTCTTTTACATCTAATTTCAATAAATTCCGTA CTCCATTAA<br>AAGAGATTAATGTATGAGGCCTTAGGAAAAGGGGTAGGGCTTAAACATCTCTACATA<br>TACCTGAATAACTTACTAGAGTGCCTTATACAAAGAAGTTCAAGAAATGTTAGTCTCC<br>TCCCTTCTCAGTAGAAAAGCAAATCCTATTTACTACTAGAAATGGGCTTACTTTCCTG<br>GTCCAGCATTCA |

|                              |                                                                                                                                                                                                                                                                  |
|------------------------------|------------------------------------------------------------------------------------------------------------------------------------------------------------------------------------------------------------------------------------------------------------------|
| gDNA ABE8 Off-Target Site 6  | CTTCCTCATGCTGCCCTTCTATAGTCAAACCCTACCCCTGCTCTTAAACCCTGGTCATCA<br>CTGATCTCTTATCCTTCTCCATAGTTTTGTCTTTTCCAGAATATCATAGAAATACAATCA<br>TGCAGAATGTAAACTTTTAAAGATTGTCTTCTTCTACTCAGTATCATGCTTTTGAGATTTA<br>TTCATGTTCTGTGTATAAATCATTATTGTTTATATTGCTGCTGAGCA                 |
| gDNA ABE8 Off-Target Site 7  | TGTCCAATGACAGGAGCATGACAACATTCCACCTATTCACTCACTCATCCTGCAT<br>TGAGTGAGTGACTGCTGTATGCCAGTGCCGACATGCAAGACTTCTCAAATTTCTTTC<br>AGTTCTAACGTTCTCAGGTTTTAGCAAGAGGGGTATTGTTTTGCCCAAAACAGGCCA<br>TCTCTCACATTTTCACTGGTATCCATTTGTGGCTTTTGTGC                                   |
| gDNA ABE8 Off-Target Site 8  | GCCCCTGAGCCATTAACCCAGACTAGCCCAGCACTGGTGCCTTCTCTGTCCCC<br>GTCCTGAACCTGCCAGGCTTCCCTGAGGTCCCCAGGCACCAGGGGATTATTGTCAG<br>GCCCCTCACTGTCGTCTGGGCCCTCGAATCATGCCTCTGTGCCAGAGTGGTGCTT<br>TGAAGAGGGGTATGGCCTTGTCACTGGGGTCTTCATGGCCCTCACCTGTTT                              |
| gDNA ABE8 Off-Target Site 9  | CAGAGACTCGGGGACTGAAGTCTCTGACATGAAGCGCTTCTGCAGGGTATAAGCA<br>TTTGGAACACGGGTAAGGCTATGGGCTAAAATCTCCAGCCAGCAGCGTTAGAAAT<br>TCAATGTTGTCCCCAAGCACTTTAGATCTCCTGAGTGTTTTGAATTCCAGTGGGAAGG<br>GAGTTCTGATAAAAGGCAGCTGAGTTTGAAGGATTGTAGCCTCAGGATGGCTCCTC<br>TGCCTTTTGACCCATG |
| gDNA ABE8 Off-Target Site 10 | AGGCCCATATGTGCTCCAGAGTTGTTCTCCAGTAAGGAGAGCATCACCGTGCTTCAGA<br>AACTGGGGTAGAGCTTGCACTTTATGTAGTTATTTAATTACTCCAACACCATATAAAG<br>CTCTCTTCTCTGATGAATTTCTTTGTACCCTTGCAAAAATGAATTGACTATGTATAT<br>GCAGGGCTATTTCTAAACTCTGTT                                                |
| gDNA ABE1 Off-Target Site 1  | CCCTGGGCTATTTTTGTCCACTGTACCTACTGTTGTTGGGACAGTCCTCATTCCAGCTT<br>AACAGTGGGAAAATAAATTTAGCCAGTCCAGGAAGTGGACAGACACCCTTGTTT<br>GGCCCTTTTCACTTAAACTATGGGTCCAGTACAGTTCAAATTATAGATATTAGGGCT<br>TCTTCCCTTGGGAAACTTGCTTTACAGCTGTGGCTGAGAATATGGCCA                           |
| gDNA ABE1 Off-Target Site 2  | AGTCCCGACAGGCTTTCATTTGTTTCCAATGGCTTATTCCACATGACTTTAGTAAAC<br>CGTACTCAATCAATTTCTGACCTTGGTACTTTGAAGCAACACTTGTATACAGATATTA<br>GGGAAGAGGGAAGTTAAGGGAGGAAAATCGAAGGTCAAAGTGTGTCAAACAAG<br>GTGCTGGGTCTAATTTATTTTATTTAGTTGCCTCTTGAATCGCTCAAGCCCATCT                      |
| gDNA ABE1 Off-Target Site 3  | TGCCCTTATGAAGAGAAGGAGGACAAGCCTATTTTCTCATCAATCTGCAGACTGATC<br>CTAGTGACAATCTGCTGTCTGTCTAGAGACTCCAGAGTAGCTCCAAACCAGTGCAGC<br>CTTGATGAGAGTAGACCAAGCCCTCCCTGTCTCAGAATCTCTCTAGTCTTAAGGAA<br>CACTATGGATTGGCTTAGGGACCCAA                                                 |
| gDNA ABE1 Off-Target Site 4  | TGAAAGCTAGGCATGGGTGAAAACACTACTTCTTTACATCTTTTCCAGGACTTAGGTAT<br>CTTTTATGTTGGCTGACTTTTATGTGGAGCATCAACCCTGTGTGAGGTGCTATGGAAG<br>GTGGGGATAGTGGGAGAAGCAATGTAGGATAATGGCTAAGAACACAGACTCCAGAG<br>CCGACTGTGTGGGTCTCAGCTGCACCTTCACTAAATCTTTCTGGGACCTTGGGAATG               |
| gDNA ABE1 Off-Target Site 5  | TGAGCATTCTCTCAGGTGTCCATGAATTTAATGAAAATTACTTAATTTTTATTATAATT<br>TCAATAATAATAAAGAAATATCTTATTTGTTATGAAGATAAAACTTCTTTTTGCCCT<br>GAAAACCTGCAACAAGGGGAGTTTACGGAATAAGAGATAAATTTTTTTTTATTAGT<br>GTTTTTTGAAATAACTTCCAAGGATGTATTCTGGG                                      |
| gDNA ABE1 Off-Target Site 6  | GCCAGGAATAATGGGTTGTGAACCCTAACATTCTGAGAAGTTAGACAGCACCTGTG<br>TGCAGTTATTCAAGATATCTTTTTTTTAAATTTTTACTTTAAGTTTTAGGGTACATGT<br>GCACAACGTGCAGGTTTGTACATATGTATACATGTGACATGTTGGTGTGCTGCACCC                                                                              |

|                                 |                                                                                                                                                                                                                                                        |
|---------------------------------|--------------------------------------------------------------------------------------------------------------------------------------------------------------------------------------------------------------------------------------------------------|
|                                 | ATTAACCTCGTCATTTACATTAGGTATATCTCCTAATGCTATCCCTCCCCACTCC                                                                                                                                                                                                |
| gDNA ABE1 Off-Target<br>Site 7  | GAATCTTGGGCACCATGGAAACTGATATCCTTGAACACGCAGAAACTTGGGTTCAAG<br>TTTTGGCAAATCTCTACTGATTAGCAGCAAACAAGTTGTGTTTCTCATGTCACCTTTGT<br>TGTTTATTGTTTATACAATAGTCTGCCTTTTCTTCTCTCTCCTTTTTCCCTCCTATGGG<br>TGGCTGCTTTCCTCATCAAGGAGATTGGTCA                             |
| gDNA ABE1 Off-Target<br>Site 8  | GCCCAGACCCTTCAGACAGAACTTCTTTGGCAGTATTTAAAAGCCATTTGAATGATGC<br>CAGGACTAGCTAAACTTCGTTTCTGAACAGCGGCAAACACCTGGTGTTTTAAAAGTAA<br>CAGTCTAATCACATAACTAGGGCTGAGTGATCTGCAAGCTGGCCTTGACTTGTCTAGA<br>AAGCACAATAGAAATAGGAGTTGGGATCAGAATGCC                         |
| gDNA ABE1 Off-Target<br>Site 9  | TGGGGCCACTCAGAGTTGATGTACACACTAGTGTCTAATTTCTGCCTGAGAATAGAGT<br>AAGACATAGTCTGAGTAGCTGCAGACAAAAGAGGCCTAGGCATGGCTACACTAGGA<br>GGACTGTGCACCCAACATTCCTAGGGGGAAAGGAAGCATGACCATTTCTCATGGAC<br>CAGTGATAGACCAGGTATAAGATAGAGCTGTGTATGAGCCAGAGGGTTGCCTGAAG<br>AGGC |
| gDNA ABE1 Off-Target<br>Site 10 | TTCCAGCCTCTGACAATAAGCACTTTTTCTCTATGACATTAATTTACTCCTTAAAGTTT<br>TCTCTTCAGCTATAATCTTAAGGTAATGGGAAATAGACATAAGTGCATTTAAATTTAT<br>AATGCACTGATTCTTGTGAAGGTAGTCTTGTAAATGAGGAAGGAATCAAACAGA<br>ACTTGTTTGCAGCTCTGCAAATGTGCAAGAAAGCTACAAACCTGCC                  |

**Supplementary Table 3. SpCas9 permutants of ABEmax are compared for their on-target editing at the *ABE16* and *YFP* loci.** The p-value, t-value, degrees of freedom (df), the mean difference and 95% confidence interval (CI) of the mean difference are shown for circularly permuted (CP1029-C, CP1029-N/C, CP1029-N variations of ABEmax) and intradomain base editors (ID1058). Welch Two-sample, two-sided t-tests were performed for all samples using R (v. 1.2.5019).

| <b>Comparison</b>            | <b>Site</b>  | <b>Mean difference</b> | <b>95% CI of mean difference</b> | <b>df</b> | <b>t value</b> | <b>p value</b> |
|------------------------------|--------------|------------------------|----------------------------------|-----------|----------------|----------------|
| ID1058-ABEmax vs. ABEmax     | <i>ABE16</i> | 0.170201               | -0.3459208 to 0.6863229          | 2.4951    | 1.1805         | 0.3381         |
| ID1058-ABEmax vs. ABEmax     | <i>YFP</i>   | -0.2910642             | -0.54542781 to -0.03670052       | 2.1492    | -4.61          | 0.0383         |
| CP1029-N/C ABEmax vs. ABEmax | <i>ABE16</i> | 0.2557402              | -0.3172852 to 0.8287657          | 2.0594    | 1.8681         | 0.199          |
| CP1029-N/C ABEmax vs. ABEmax | <i>YFP</i>   | -0.35545289            | -0.61617168 to -0.09473409       | 2.0675    | -5.6862        | 0.0274         |
| CP1029-N ABEmax vs. ABEmax   | <i>ABE16</i> | 0.2233756              | -0.2596459 to 0.7063972          | 3.1518    | 1.4324         | 0.2433         |
| CP1029-N ABEmax vs. ABEmax   | <i>YFP</i>   | -0.36247793            | -0.5965396 to -0.1284163         | 2.5304    | -5.4885        | 0.01831        |
| CP1029-C ABEmax vs. ABEmax   | <i>ABE16</i> | 0.3054103              | -0.2756743 to 0.8864950          | 2.0177    | 2.2425         | 0.153          |
| CP1029-C ABEmax vs. ABEmax   | <i>YFP</i>   | -0.36354865            | -0.62726903 to -0.09982826       | 2.0327    | -5.8407        | 0.02704        |



**Supplementary Table 4. SpCas9 permutants of ABEmax are compared for their off-target editing at several promiscuous RNA transcripts.** The p-value, t-value, degrees of freedom (df), the mean difference and 95% confidence interval (CI) of the mean difference are shown for circularly permuted (CP1029-C, CP1029-N/C, CP1029-N variations of ABEmax) and intradomain base editors (ID1058). Welch Two-sample, two-sided t-tests were performed for all samples using R (v. 1.2.5019).

| Comparison                   | Site           | Mean difference | 95% CI of mean difference     | df     | t value  | p value  |
|------------------------------|----------------|-----------------|-------------------------------|--------|----------|----------|
| ABEmax vs. CP1029-C ABEmax   | <i>DNAJB</i>   | -0.3393451      | -0.4611651 to -0.2175250      | 13.614 | -5.9905  | 3.72E-05 |
| ABEmax vs. CP1029-C ABEmax   | <i>MTA2</i>    | 0.0297972       | -0.02156468 to 0.08115909     | 15.616 | 1.2323   | 0.2361   |
| ABEmax vs. CP1029-C ABEmax   | <i>PTBP2</i>   | -0.0327717      | -0.11106515 to 0.04552172     | 14.977 | -0.89229 | 0.3863   |
| ABEmax vs. CP1029-C ABEmax   | <i>SAP30BP</i> | 0.0058073       | -0.03618323 to 0.04779776     | 14.353 | 0.29594  | 0.7715   |
| ABEmax vs. CP1029-C ABEmax   | <i>LCMT1</i>   | -0.0197466      | -0.08451419 to 0.04502095     | 14.424 | -0.65211 | 0.5246   |
| ABEmax vs. CP1029-C ABEmax   | <i>SCAP</i>    | 0.0890025       | 0.03068875 to 0.14731614      | 13.336 | 3.2889   | 0.005696 |
|                              |                |                 |                               |        |          |          |
| ABEmax vs. CP1029-N/C ABEmax | <i>DNAJB</i>   | -0.3143563      | -0.4639470 to -0.1647655      | 11.741 | -4.5899  | 0.000657 |
| ABEmax vs. CP1029-N/C ABEmax | <i>MTA2</i>    | 0.0218489       | -0.02760433 to 0.07130205     | 15.014 | 0.94161  | 0.3613   |
|                              |                |                 |                               |        |          |          |
| ABEmax vs. CP1029-N/C ABEmax | <i>PTBP2</i>   | -0.0633728      | -0.130504238 to 0.003758504   | 15.999 | -2.0012  | 0.06263  |
| ABEmax vs. CP1029-N/C ABEmax | <i>SAP30BP</i> | -0.0093725      | -0.05269451 to 0.03394937     | 15.082 | -0.46091 | 0.6514   |
|                              |                |                 |                               |        |          |          |
| ABEmax vs. CP1029-N/C ABEmax | <i>LCMT1</i>   | -0.0642578      | -0.120681366 to -0.007834312  | 15.73  | -2.4176  | 0.02815  |
| ABEmax vs. CP1029-N/C ABEmax | <i>SCAP</i>    | 0.0510479       | -0.00552741 to 0.10762317     | 12.085 | 1.9644   | 0.0729   |
|                              |                |                 |                               |        |          |          |
| ABEmax vs CP1029-N ABEmax    | <i>DNAJB</i>   | -0.1968339      | -0.41756098 to 0.02389321     | 9.6785 | -1.9959  | 0.07483  |
| ABEmax vs CP1029-N ABEmax    | <i>MTA2</i>    | 0.0416136       | -0.00995801 to 0.09318521     | 15.662 | 1.7136   | 0.1063   |
| ABEmax vs CP1029-N ABEmax    | <i>PTBP2</i>   | 0.025529        | -0.05922721 to 0.11028514     | 14.137 | 0.64543  | 0.529    |
| ABEmax vs CP1029-N ABEmax    | <i>SAP30BP</i> | 0.02741663      | -0.02043076 to 0.07526402     | 15.998 | 1.2147   | 0.2421   |
| ABEmax vs CP1029-N ABEmax    | <i>LCMT1</i>   | -0.0257277      | -0.08072827 to 0.02927279     | 15.88  | -0.99224 | 0.336    |
| ABEmax vs CP1029-N ABEmax    | <i>SCAP</i>    | 0.0821117       | 0.01039632 to 0.15382707      | 15.915 | 2.4283   | 0.02741  |
| ABEmax vs ID1058-ABEmax      | <i>DNAJB</i>   | -0.3002663      | -0.4423766 to -0.1581561      | 12.152 | -4.5972  | 0.000594 |
| ABEmax vs ID1058-ABEmax      | <i>MTA2</i>    | 0.050258        | -0.0009715148 to 0.1014873325 | 15.585 | 2.0842   | 0.05398  |
| ABEmax vs ID1058-ABEmax      | <i>PTBP2</i>   | 0.0148402       | -0.05359970 to 0.08328008     | 15.97  | 0.45974  | 0.6519   |
| ABEmax vs ID1058-ABEmax      | <i>SAP30BP</i> | 0.02419198      | -0.01810152 to 0.06648549     | 14.544 | 1.2225   | 0.2409   |
| ABEmax vs ID1058-ABEmax      | <i>LCMT1</i>   | 0.0253978       | -0.02749142 to 0.07828701     | 15.997 | 1.018    | 0.3238   |
| ABEmax vs ID1058-ABEmax      | <i>SCAP</i>    | 0.1188224       | 0.06039193 to 0.17725277      | 13.409 | 4.3797   | 0.000693 |

**Supplementary Table 5. On-target gDNA editing efficiencies of the microABE-I744 and the Sa-miniABEmax(V82G).** The p-values, t-values, df, mean difference, and 95% CI of mean difference are shown. Welch Two-sample, two-sided t-tests were performed for all samples using R (v. 1.2.5019).

| <b>Comparison</b>                        | <b>Site</b>   | <b>Mean difference</b> | <b>95% CI of mean difference</b> | <b>df</b> | <b>t value</b> | <b>p value</b> |
|------------------------------------------|---------------|------------------------|----------------------------------|-----------|----------------|----------------|
| microABE-I744 vs.<br>Sa-miniABEmax(V82G) | <i>ABE16</i>  | 0.104372335            | 0.09841275 to 0.11033182         | 3.9995    | 48.628         | 1.07E-06       |
| microABE-I744 vs.<br>Sa-miniABEmax(V82G) | <i>PCDH15</i> | 0.0023654069           | 0.000948219 to 0.003782595       | 3.1719    | 5.1526         | 0.01234        |

**Supplementary Table 6. Off-target gDNA editing efficiencies of the microABE-I744 and the Sa-miniABEmax(V82G).** The p-values, t-values, df, mean difference, and 95% CI of mean difference are shown. Welch Two-sample, two-sided t-tests were performed for all samples using R (v. 1.2.5019).

| Comparison                            | Site           | Mean difference | 95% CI of mean difference    | df     | t value | p value  |
|---------------------------------------|----------------|-----------------|------------------------------|--------|---------|----------|
| microABE-I744 vs. Sa-miniABEmax(V82G) | <i>DNAJB</i>   | -0.02849716     | -0.03680003 to -0.02019428   | 13.259 | -7.4001 | 4.63E-06 |
| microABE-I744 vs. Sa-miniABEmax(V82G) | <i>MTA2</i>    | -0.00869564     | -0.012389632 to -0.005001656 | 14.614 | -5.029  | 0.000161 |
| microABE-I744 vs. Sa-miniABEmax(V82G) | <i>PTBP2</i>   | 0.00123583      | -0.02892973 to 0.03140139    | 10.108 | 0.09115 | 0.9292   |
| microABE-I744 vs. Sa-miniABEmax(V82G) | <i>SAP30BP</i> | -0.005169157    | -0.007055860 to -0.003282453 | 14.007 | -5.876  | 4.02E-05 |
| microABE-I744 vs. Sa-miniABEmax(V82G) | <i>LCMT1</i>   | -0.00095559     | -0.004171663 to 0.002260497  | 15.995 | -0.6299 | 0.5377   |
| microABE-I744 vs. Sa-miniABEmax(V82G) | <i>SCAP</i>    | 0.003247691     | -0.007558782 to 0.014054164  | 8.1066 | 0.69145 | 0.5086   |
|                                       |                |                 |                              |        |         |          |
| G129 vs. microABE-I744                | <i>DNAJB</i>   | 0.02022031      | 0.01493234 to 0.02550827     | 14.498 | 8.175   | 8.35E-07 |
| G129 vs. microABE-I744                | <i>MTA2</i>    | 0.01617262      | 0.01203730 to 0.02030795     | 13.416 | 8.4223  | 1.02E-06 |
| G129 vs. microABE-I744                | <i>PTBP2</i>   | 0.01171024      | -0.02287688 to 0.04629737    | 15.208 | 0.72079 | 0.482    |
| G129 vs. microABE-I744                | <i>SAP30BP</i> | 0.003052556     | 0.001232690 to 0.004872421   | 14.395 | 3.5883  | 0.002851 |
| G129 vs. microABE-I744                | <i>LCMT1</i>   | 0.0191464       | 0.01645462 to 0.02183818     | 12.125 | 15.48   | 2.37E-09 |
| G129 vs. microABE-I744                | <i>SCAP</i>    | 0.004979992     | -0.006018323 to 0.015978308  | 9.5445 | 1.0155  | 0.3349   |

### **Supplementary Data File 1.**

**Genomic DNA off-target analysis based on sequence homology of sgRNA targeting *ABE1*, *ABE8*, and *ABE11*.** The sgRNA for the top three edited genomic sites were selected and each of the three independent technical replicates were sequenced using parallel mock samples as a negative control (n=3). Data are presented as the sum of reads for each aligned sequence across the three replicates.

### **Supplementary Data File 2.**

**Amino acid sequence of microABE I744, SaCas9-miniABEmax (V82G), SaCas9-ABEmax, microAIDx I744.**

### Supplementary Figure 1.

**Surface render of SpCas9n with key residues for permutant variants highlighted.** *S. pyogenes* Cas9 (purple PDB: 4OO8) complexed with target DNA (red) and gRNA (orange) is displayed. Key residues for circular permutation (1010, magenta; 1029, cyan; 1058, green) or intradomain insertion (202, yellow; 208, navy; 468, black; 1058, green) of the hAIDx protein domain are highlighted. Numbering is considered from the starting methionine at position 1. All graphical representations generated with PyMol (Methods). BH, Bridge helix.

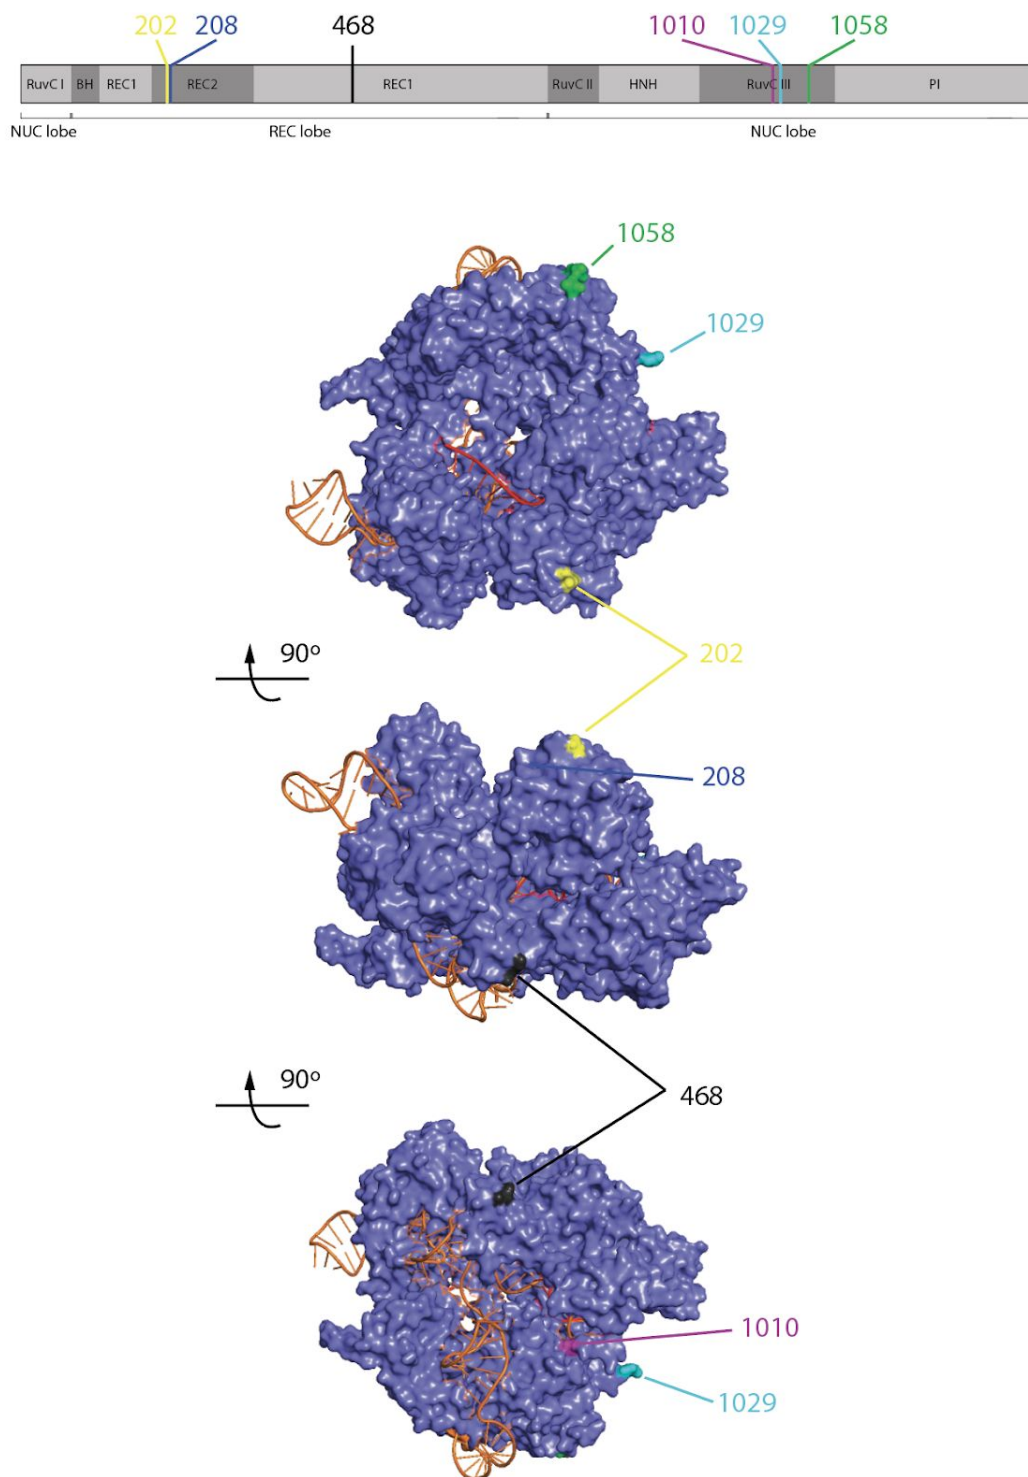

## Supplementary Figure 2.

Cytosine base editors (CBEs) are shown for BE3, TAM-AIDx (as CP and ID constructs), and Target-AID (C-terminal linked), which have a C-terminal linked uracil glycosylase inhibitor. The antisense strand is shown; cytosine-to-thymine transitions are represented as guanine-to-adenine transitions

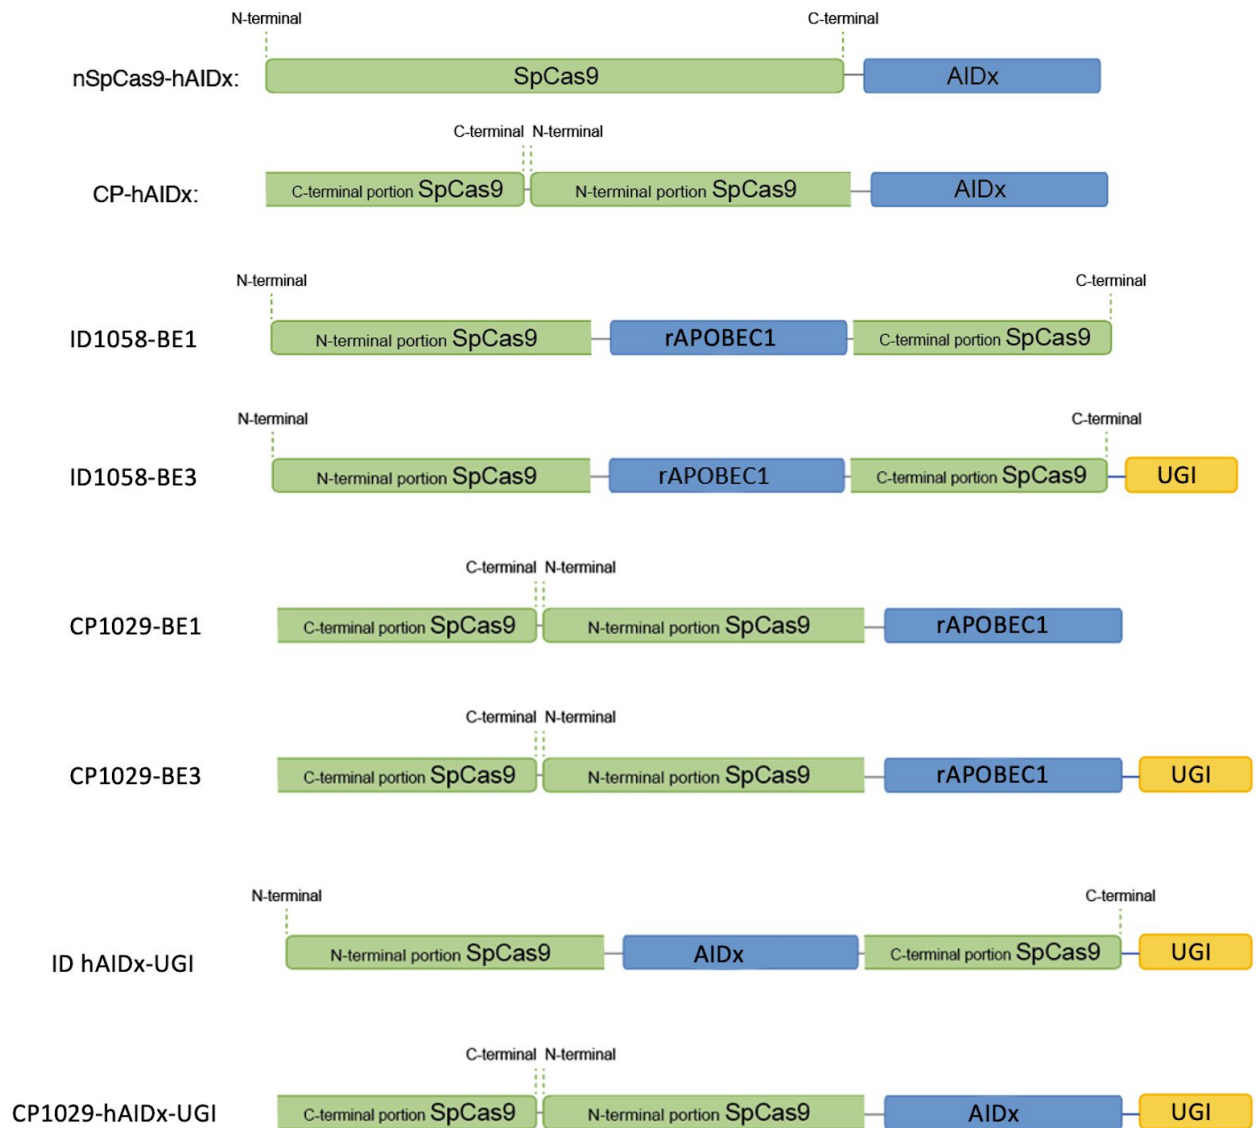

### Supplementary Figure 3.

hAIDx was either circularly permuted (CP) or inserted as an intradomain construct (ID) into SpCas9. Raw data points are shown for the on-target editing efficiency for cytosine substitutions at the highest-edited position in the original TAM-AIDx construct against an sgRNA targeting the *YFP* locus.

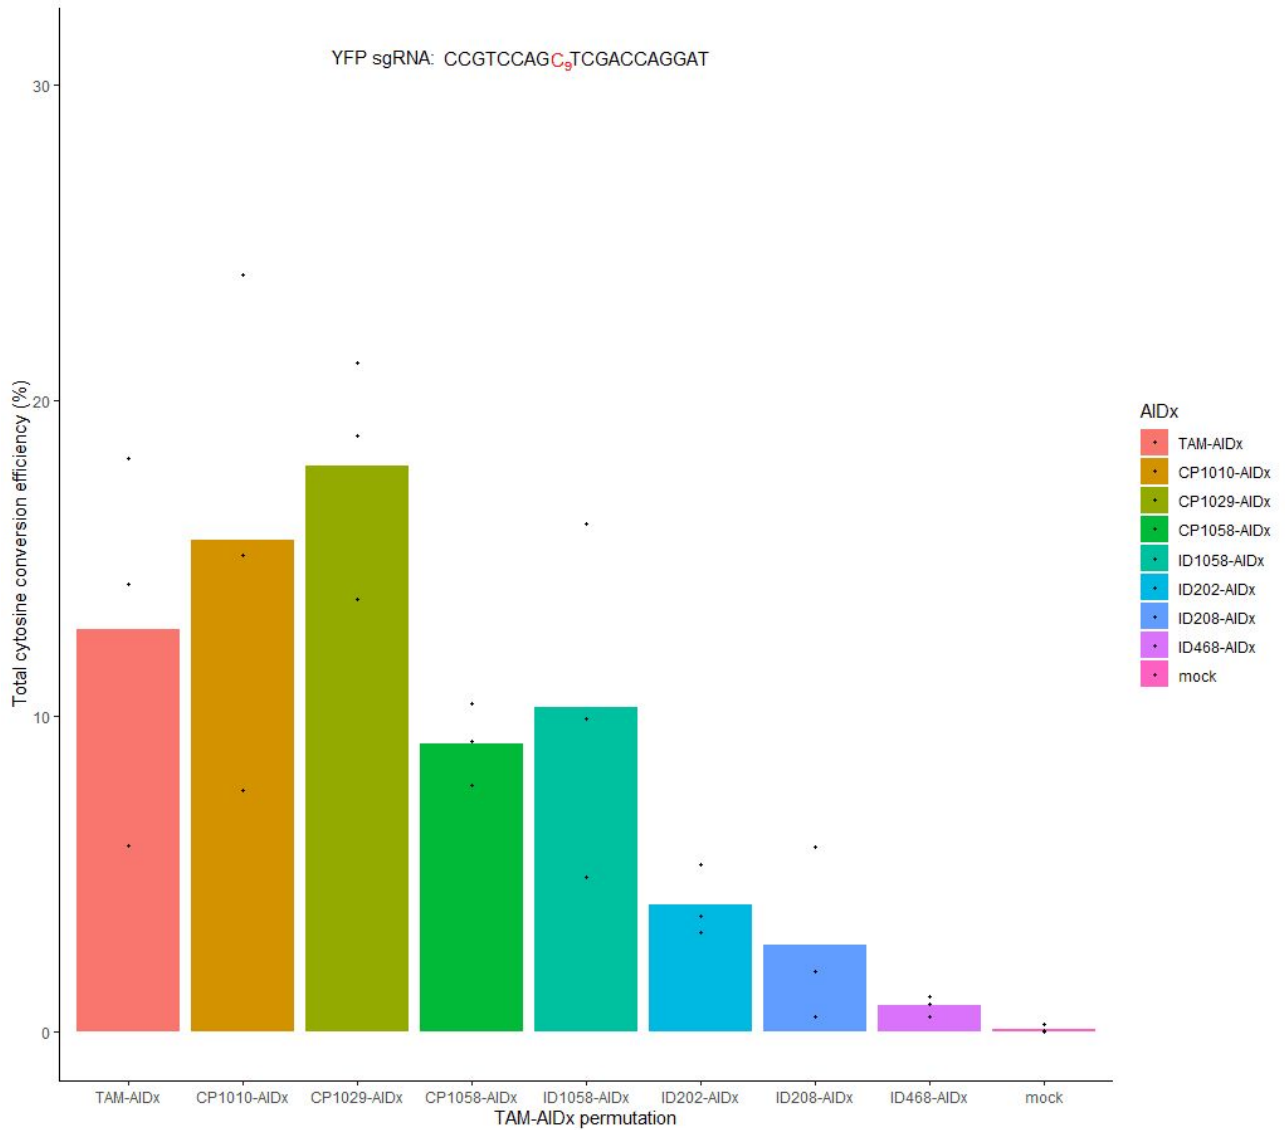



**Supplementary Figure 4.**

**Example YFP site allele tables from genomic DNA isolated from HEK293A-YFP cells after editing with nSpCas9, where the hAIDx has been linked to the C-terminal, inserted in the PI domain (at residue 1058) or linked to a circularly permuted nSpCas9 (again at residue 1058).** Each of these constructs had no UGI. Samples were sequenced on an Illumina MiSeq and analyzed using CRISPResso2. The reference sequence and gRNA are displayed at the top, with the frequencies and corresponding sequencing read counts being shown for each allele.

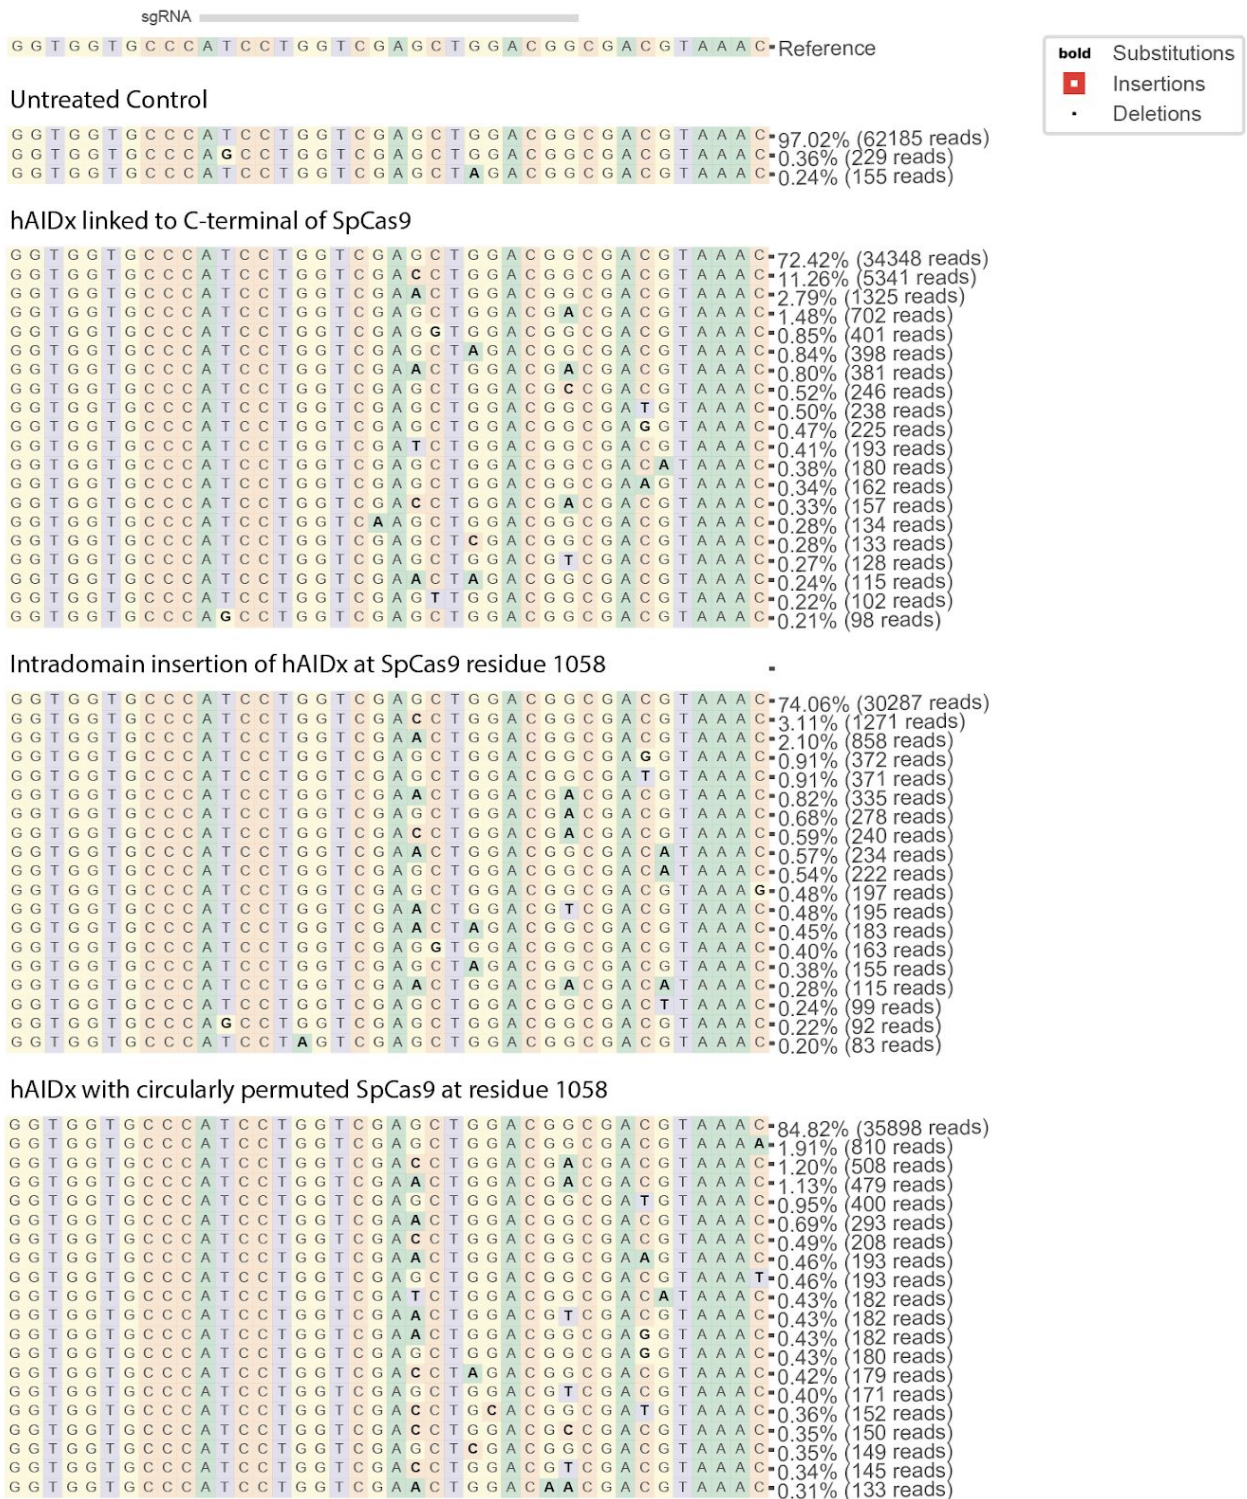





## Supplementary Figure 6.

**SpCas9 permutants showing both circularly permuted and intradomain ABEMax and miniABEMax variants.** Off-target profiling was considered at the highest-edited adenine position in the *MTA2*, *PTBP2*, *LCMT1*, *SCAP*, *DNAJB* and *SAP30BP* transcripts, as described in **Methods**. MiSeq data derived from nine independent replicates with sgRNAs targeting the *ABE16*, *YFP*, or non-targeting loci (n=3 biological replicates with three respective technical replicates). Boxplots display the interquartile range; upper and lower hinges correspond to the first and third quartile (25 and 75th percentile) centred around the mean.

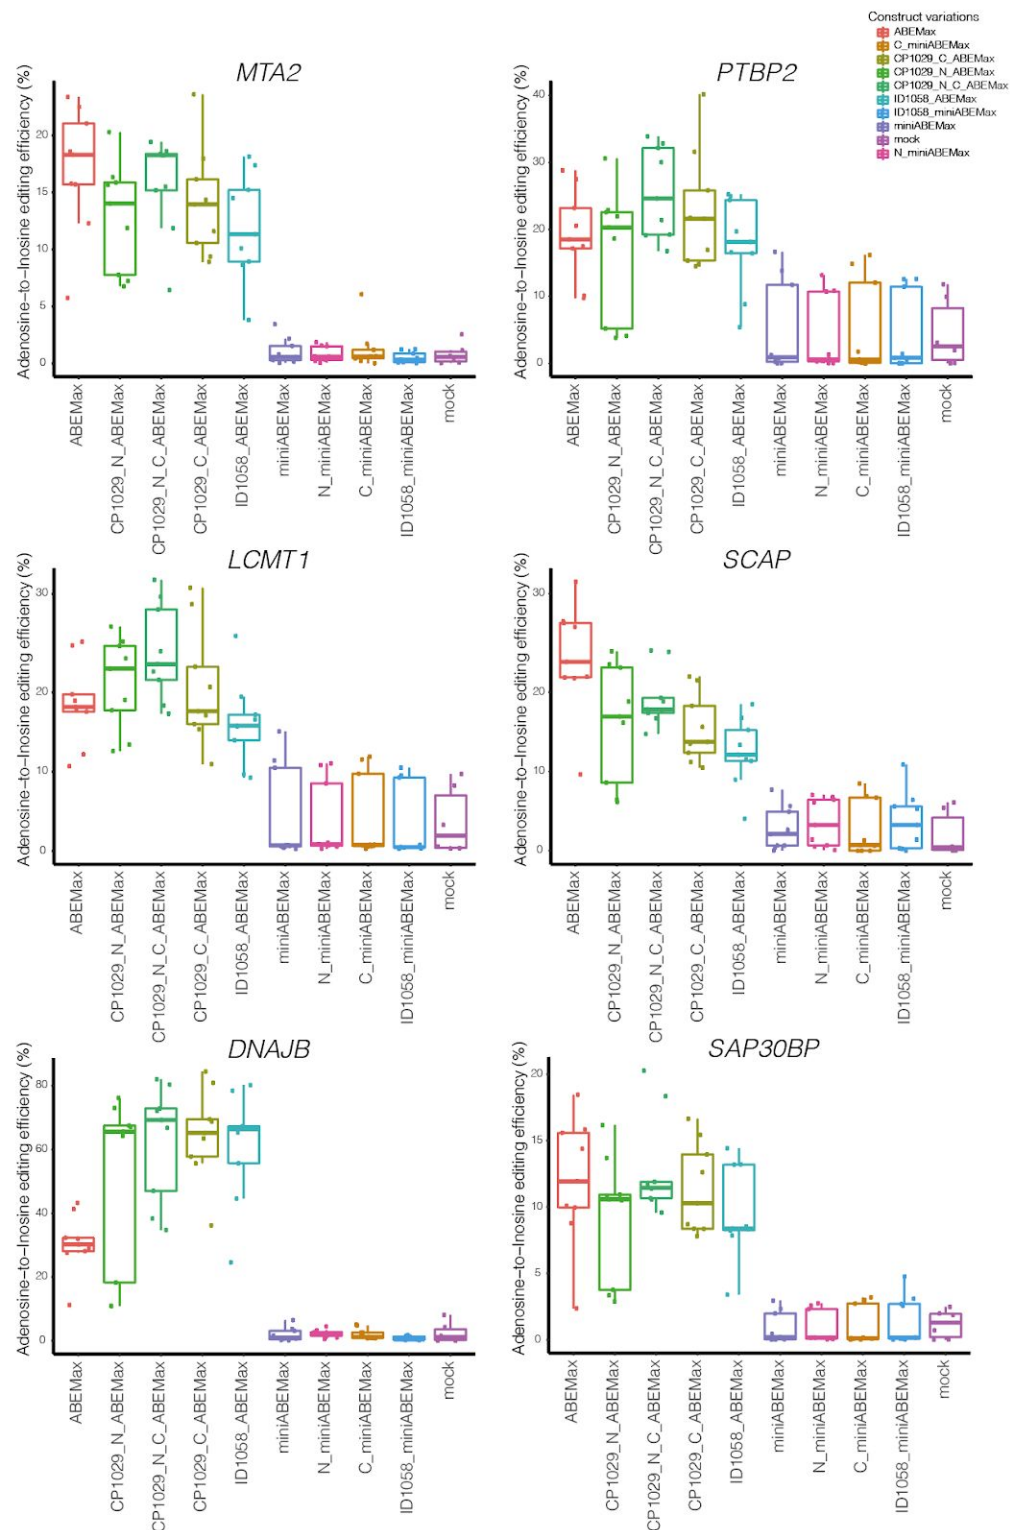

### Supplementary Figure 7.

**Heatmap showing the localized, off-target profile of SpCas9 ABEmax permutants across promiscuous RNA transcripts.** Average editing across the transcript was considered for adenosine-to-inosine (guanine), as described in **Methods**, including that of the position of the highest-edited adenine in the amplicon. Results display the average adenosine to inosine editing at each adenosine nucleotide position within the amplicon and scaled accordingly using the 'superheat' package in R (v. 1.2.5019) . MiSeq data was pooled across nine independent replicates.

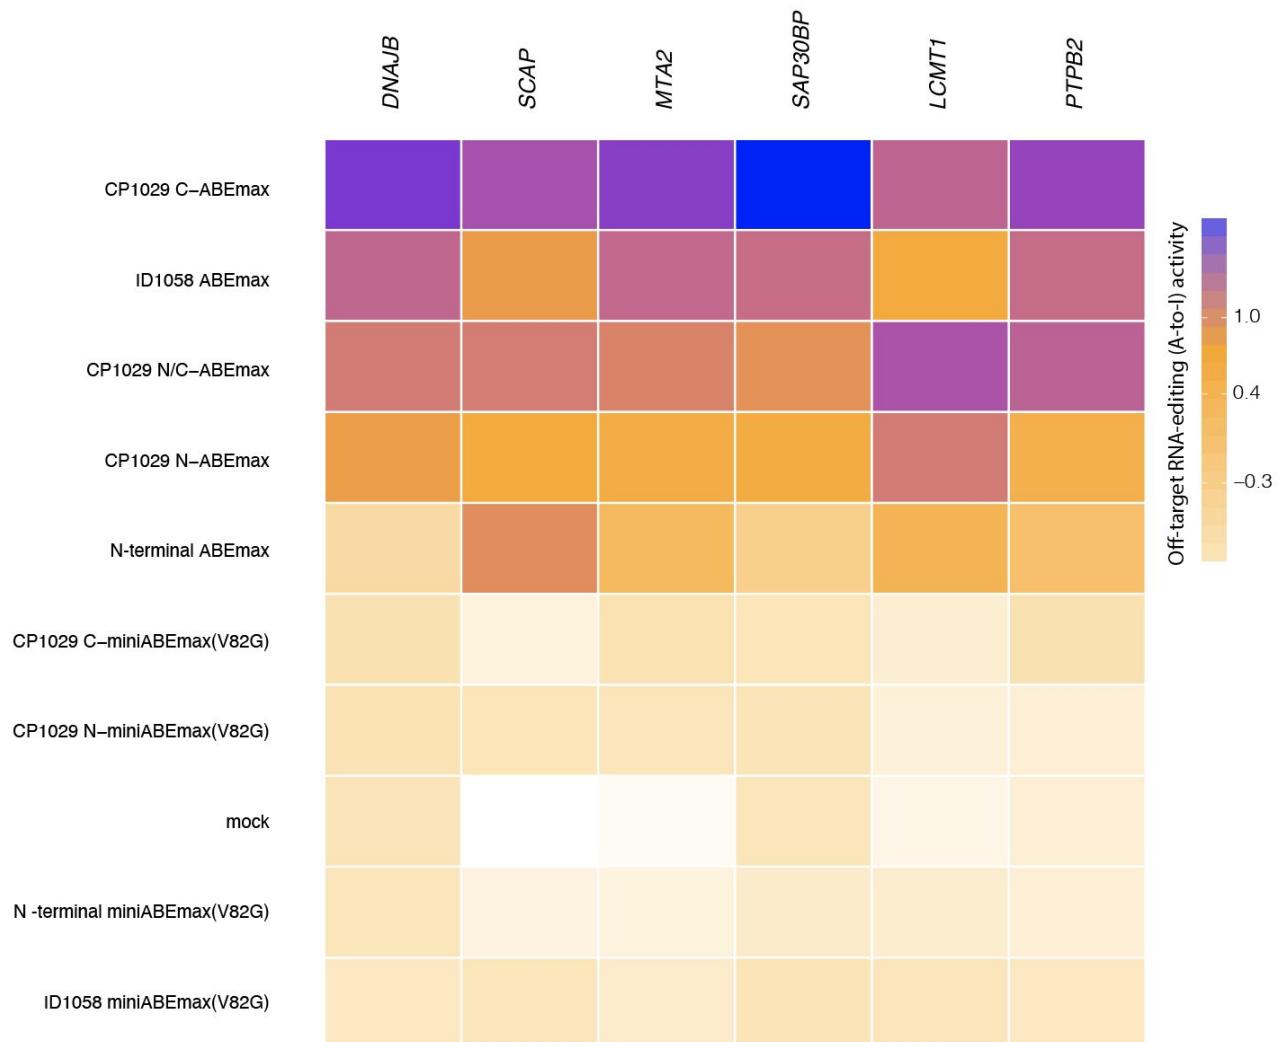

**Supplementary Figure 8.**

**On-target editing efficiencies for various SpCas9 ABEmax permutants with sgRNA targeting the *ABE16* locus.** Results are presented as the mean values from MiSeq sequencing across three independent technical replicates.

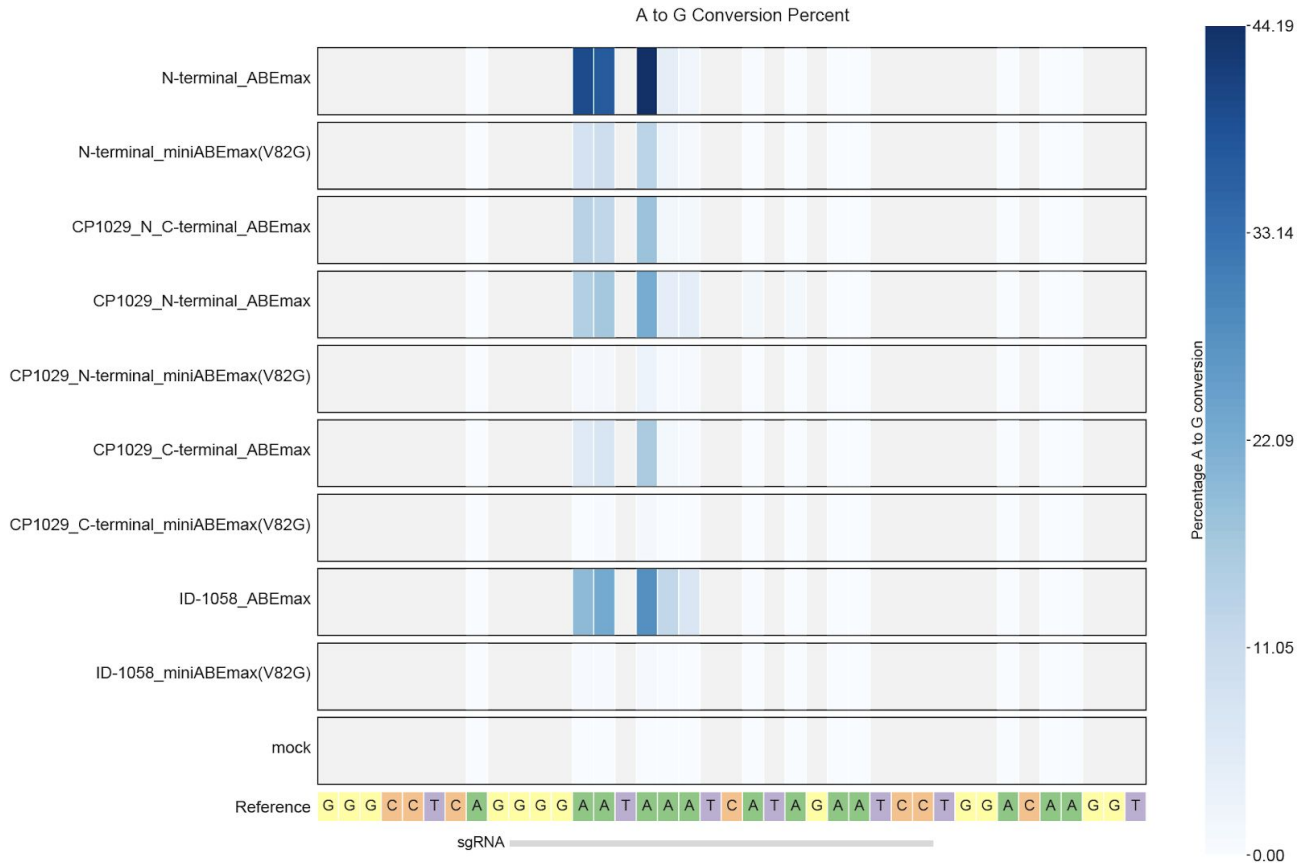

### Supplementary Figure 9.

#### On-target editing efficiencies for various SpCas9 ABEmax permutants with sgRNA targeting the *YFP* locus.

Results are presented as the mean values from MiSeq sequencing across three independent technical replicates.

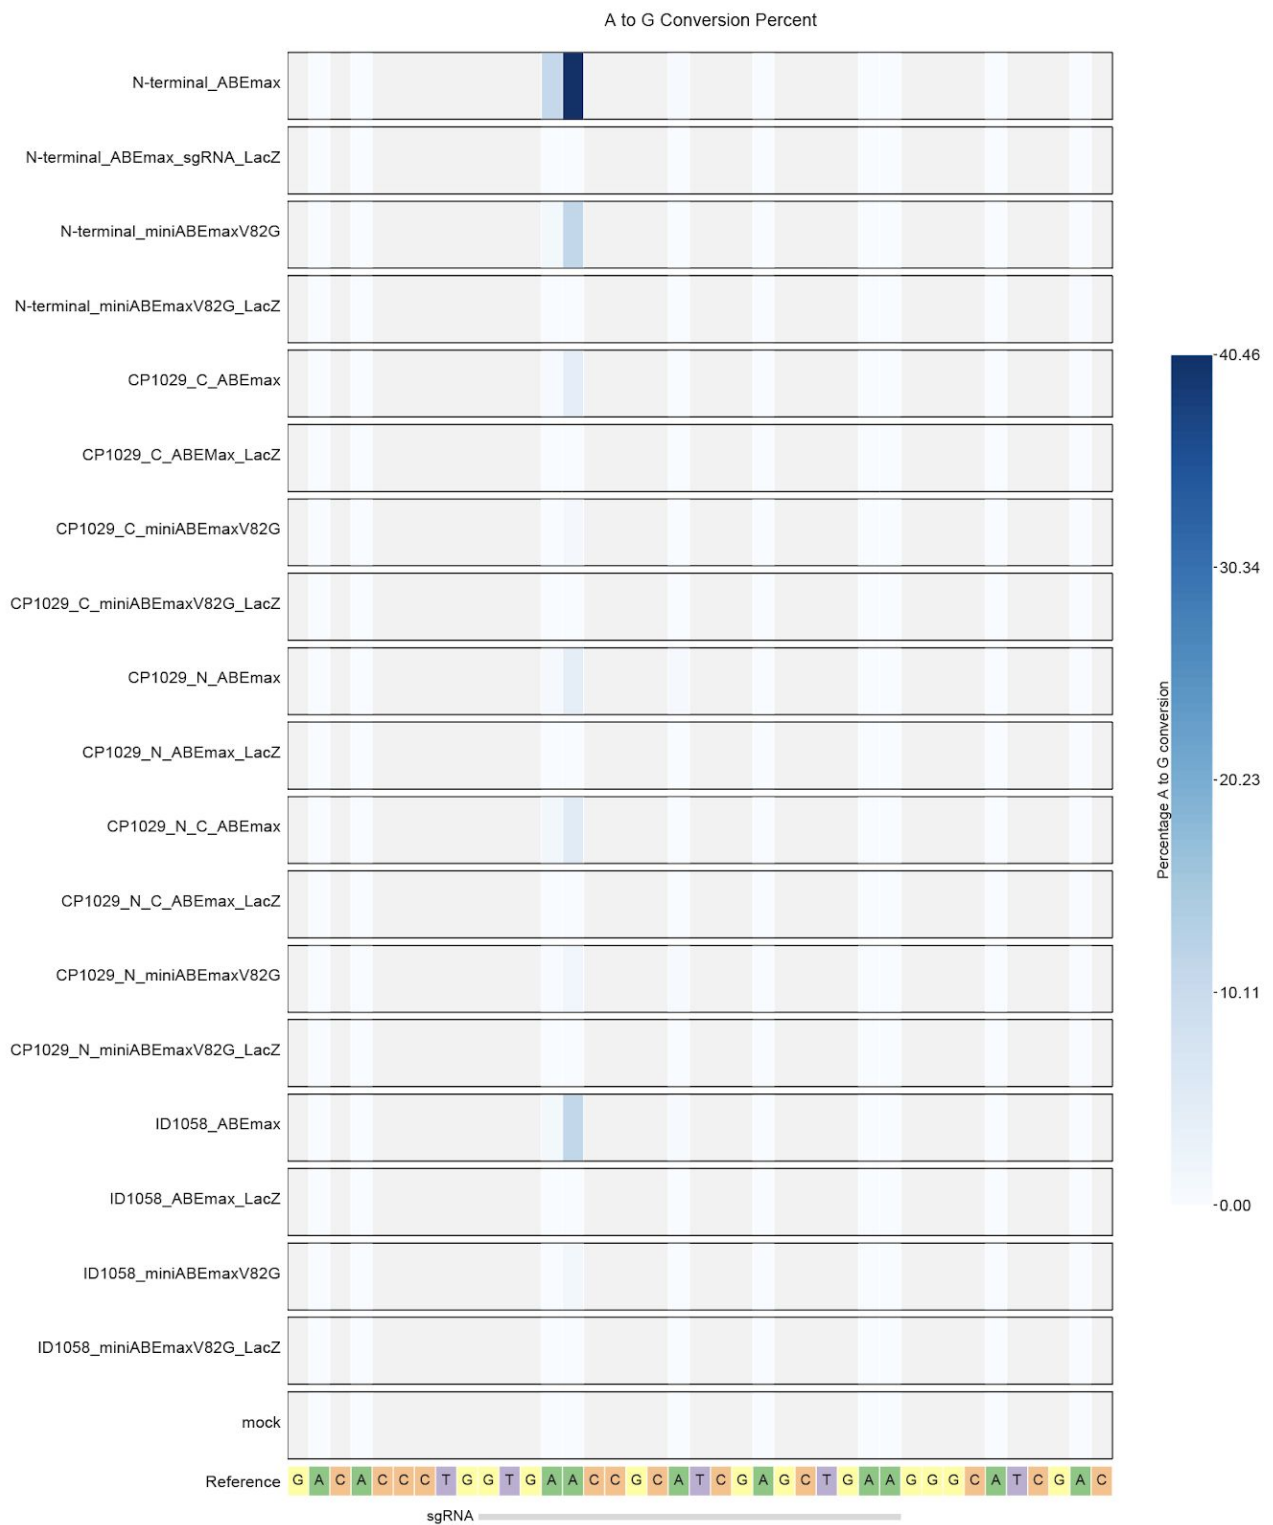

**Supplementary Figure 10.**

**Engineering and profiling of a microABE.** Surface structural representations of *S. aureus* Cas9 (purple; PDB:5CZZ) with the corresponding target DNA (red) and gRNA (orange) complex. Residues marked in yellow or green, demarcate amino acid positions 119-132 or 730-745, respectively. All graphical representations generated with PyMol (Methods).

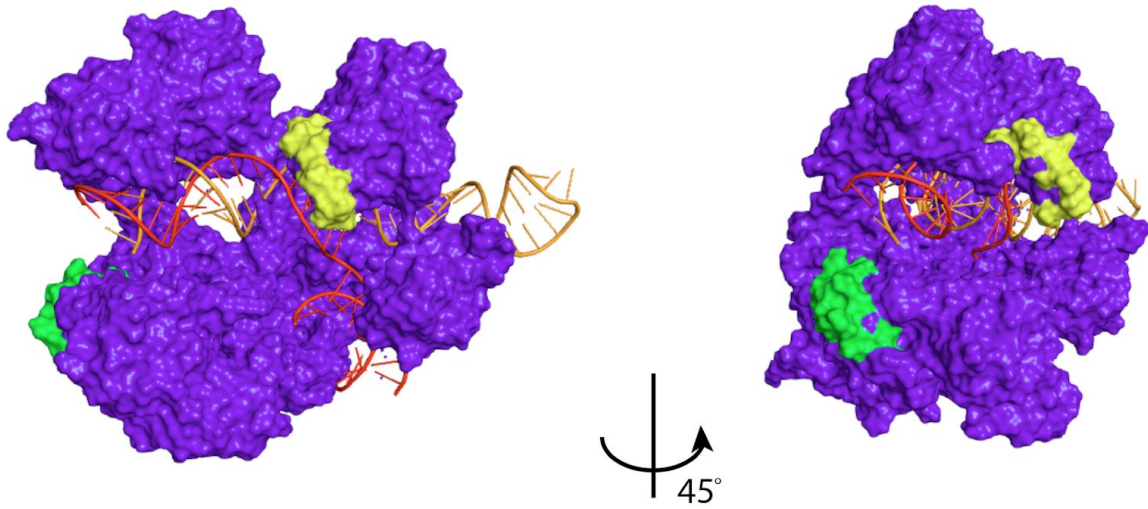

**Supplementary Figure 11.**

**Base editing activity for each intradomain inserted miniABEmax (V82G) Sacas9 tested.** The SaCas9n amino acid insertion site is displayed, and each datapoint represents the mean across three technical replicates. A nickase SaCas9 with an N-terminal linked ABEmax and miniABEmax (V82G) was used for direct comparison.

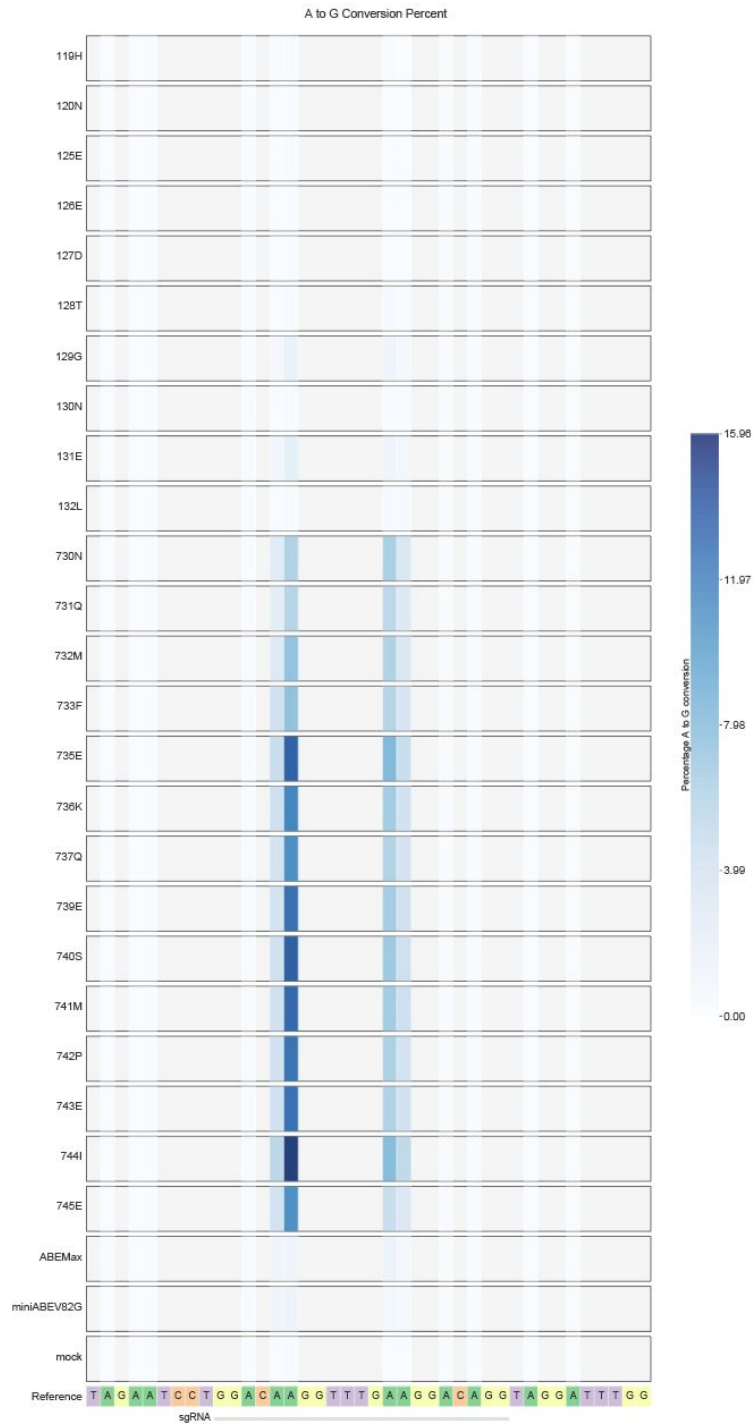

### Supplementary Figure 12.

**On-target activity window of intradomain inserted miniABEmax (V82G) nSacas9 constructs compared to N-terminal linked ABEmax or miniABEmax (V82G).** Editing efficiency was determined at various adenine positions in a 21-nucleotide activity window derived from a composite of MiSeq data generated by sgRNAs targeting the *ABE16* and *RNF2* loci. Individual data points are shown for each construct at each nucleotide position across two independent biological replicate sgRNA sites (*ABE16* and *RNF2*) (n=3 technical replicates for each sgRNA site performed on independent days).

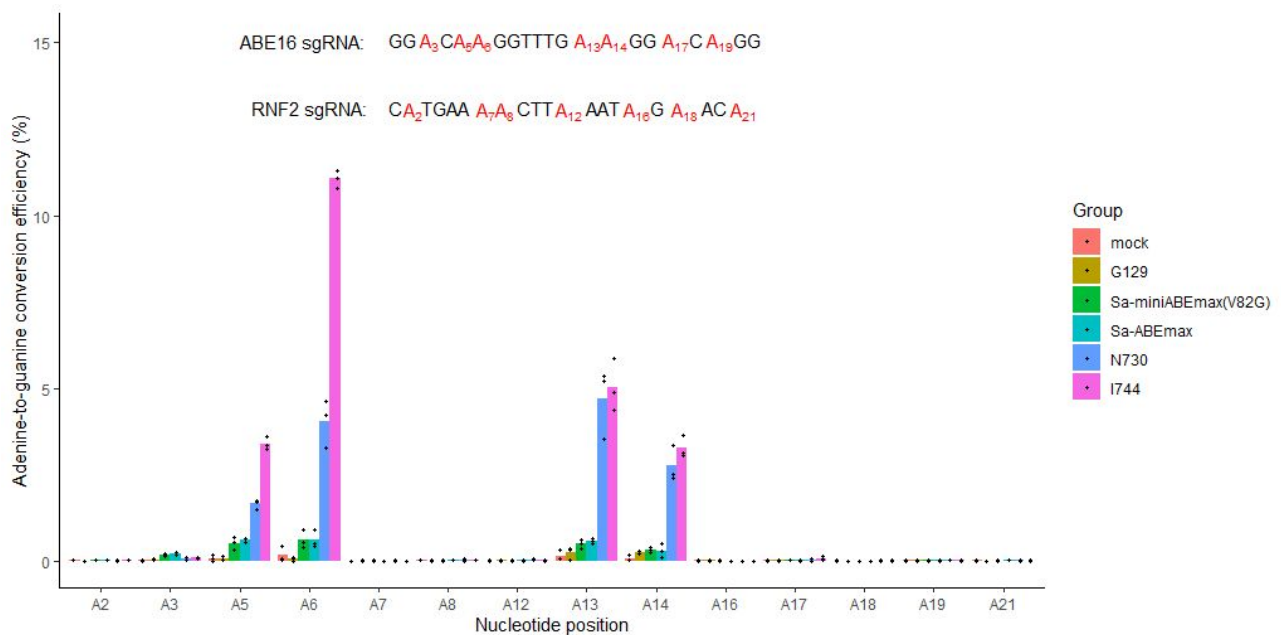



**Supplementary Figure 13.**

**Cytosine deaminase efficiencies for SaCas9n intradomain inserted hAIDx.** hAIDx protein domain was inserted at residue G129, N730 and I744 in SaCas9n. sgRNAs targeting the HEKsite4, ABE5, and ABE9 sites were used. Heatmap data points are presented as the average over three technical replicates.

**HEKsite4:**

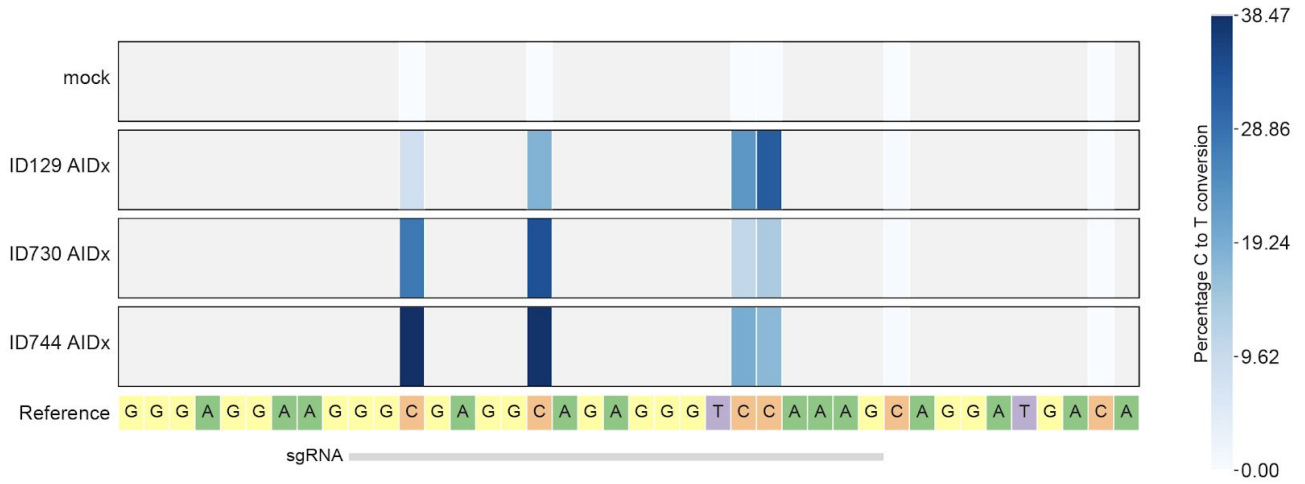

**ABE5:**

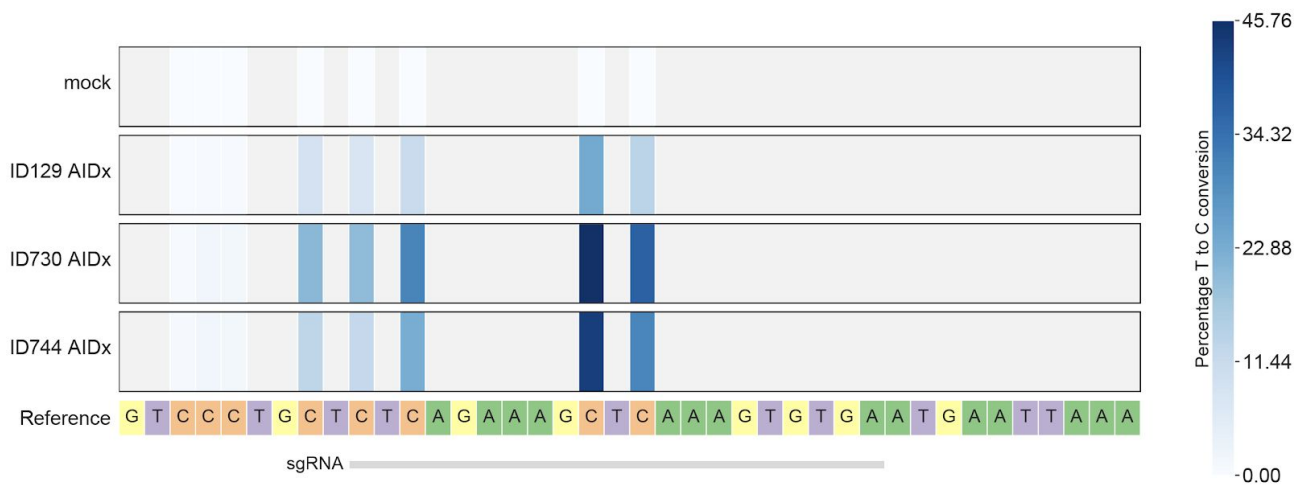

**ABE9:**

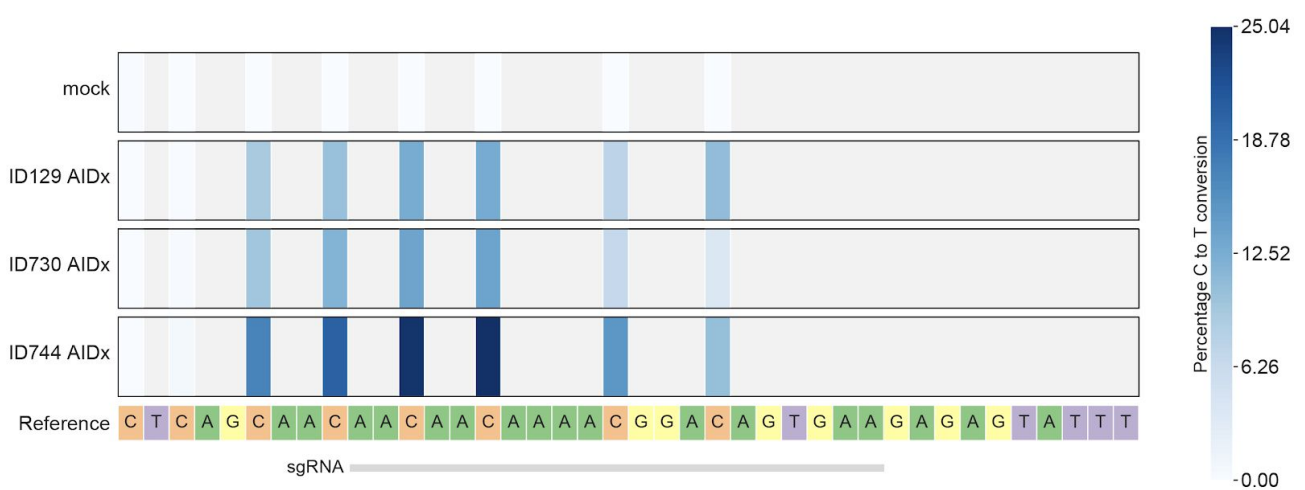

### Supplementary Figure 14.

**Off-target profiling of Sa-ABEmax, Sa-miniABEmax(V82G), G129, N730, and I744 (microABE I744).** Data were generated from nine independent replicates using sgRNA targeting *ABE16*, *YFP*, and non-targeting *LacZ*. Off-target editing was considered at the position of the highest-edited adenine nucleotide in the *MTA2*, *PTBP2*, *LCMT1*, *SCAP*, *DNAJB* and *SAP30BP* transcripts, as described in **Methods**. Boxplots display the interquartile range; upper and lower hinges correspond to the first and third quartile (25 and 75th percentile) centred around the mean.

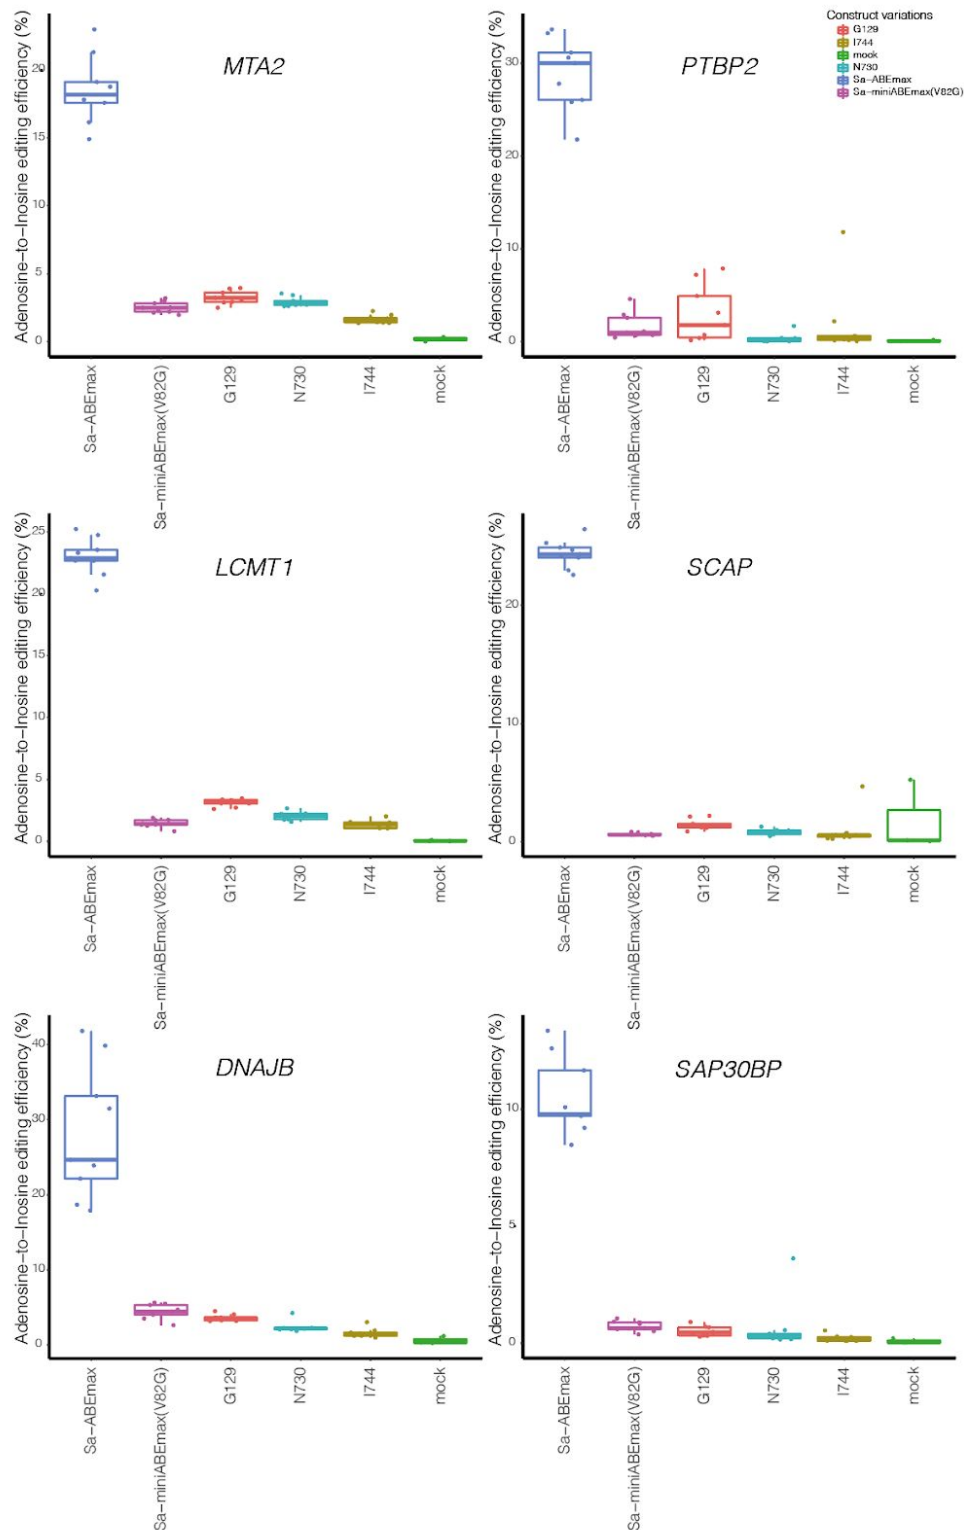

**Supplementary Figure 15.**

**Heatmap showing the localized, off-target profile of SaCas9 ABE permutants across promiscuous RNA transcripts.** Average editing across the transcript was considered for adenosine-to-inosine (guanine), as described in **Methods**, including that of the position of the highest-edited adenine in the amplicon. MiSeq data was pooled across nine independent replicates.

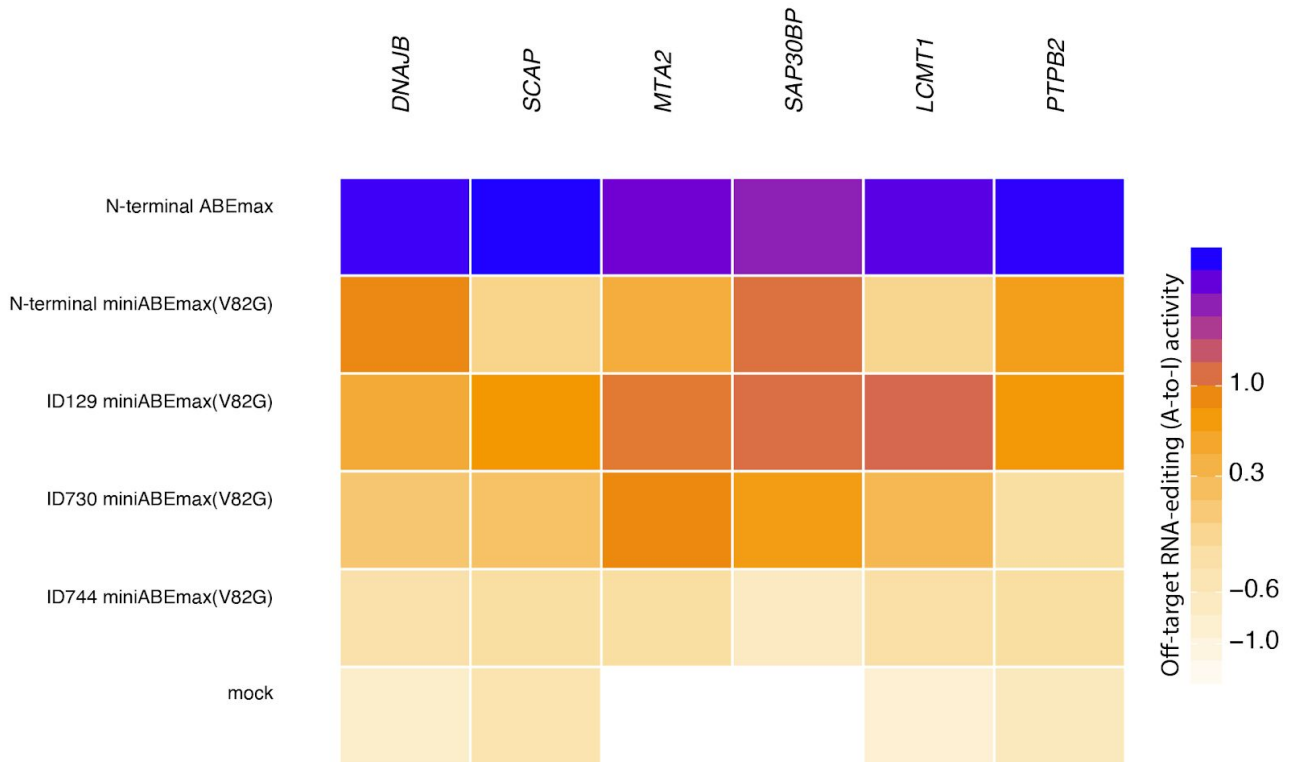

### Supplementary Figure 16.

Uncropped images of western blot gels used to demonstrate immuno-binding of antibodies targeting the N- and C-terminal of SaCas9, for each base editor constructed tested. Relative densitometry for both the N- and C-terminal SaCas9 antibodies to histone H3 was calculated by dividing the chemiluminescent intensity for the protein band-of-interest by the signal for the corresponding loading control for each well.

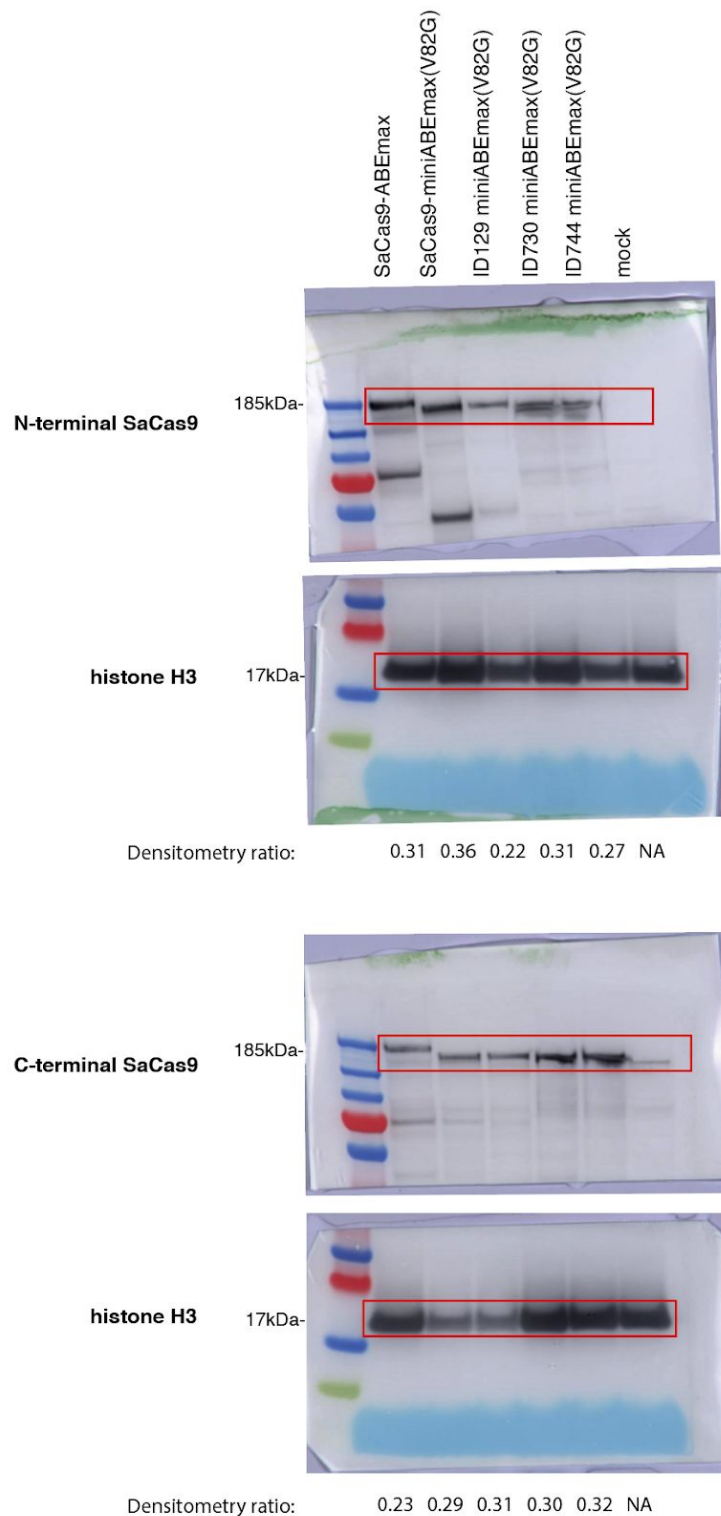

**Supplementary Figure 17.**

**Transcriptomic profiling of microABE 1744 (ID744 miniABEmax [V82G]), Sa-ABEmax (N-terminal ABEmax), and Sa-miniABEmax (V82g) (N-terminal miniABEmax [V82G]) showing the number of reads containing adenosine-to-inosine editing in HEK293A-YFP cells. Number of reads showing adenosine-to-inosine edits in the transcriptome is arranged by mapped alignments to their chromosomal position (n=3 independent pooled technical replicates harvested on separate days; refer to **Methods RNA-seq analysis**).**

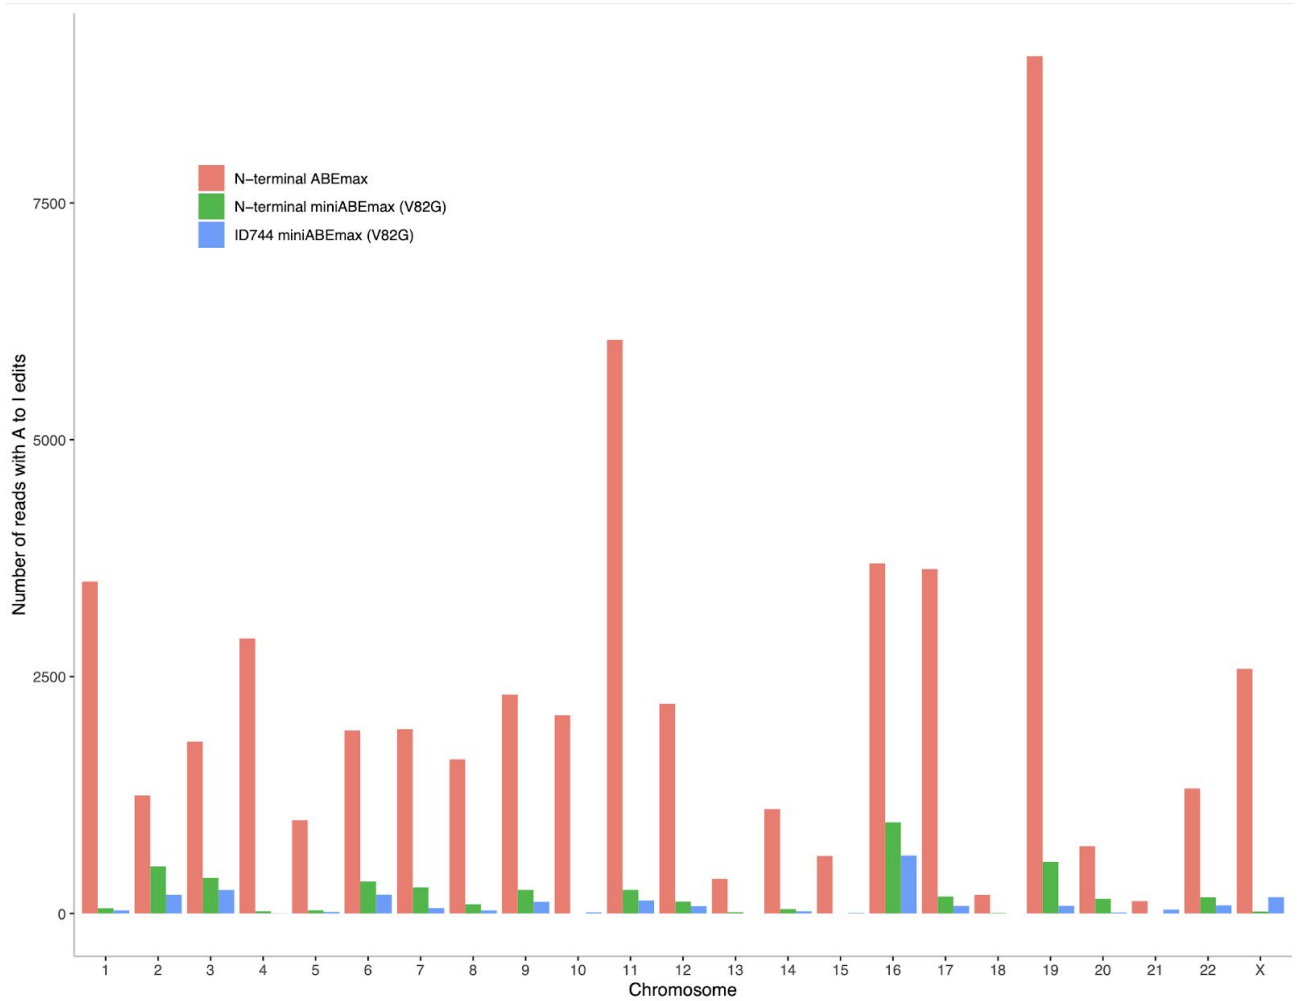

**Supplementary Figure 18.**

**Editing profile for the nSaCas9 N-terminal linked Sa-ABEmax, Sa-miniABEmax(V82G) and their nSaCas9-KKH counterparts compared to the microABE I744 (intradomain-SaCas9n I744) with a sgRNA targeting the *PCDH15* Arg245Ter (NM\_033056.4:c.733C>T) variant or *LacZ*.** The disease causing variant being targeted is demarcated by the red rectangle. Heatmap data points are presented as the average over three technical replicates. Nucleotide position is shown for the antisense strand whereby a thymine-to-cytosine transition indicates adenine-to-guanine editing.

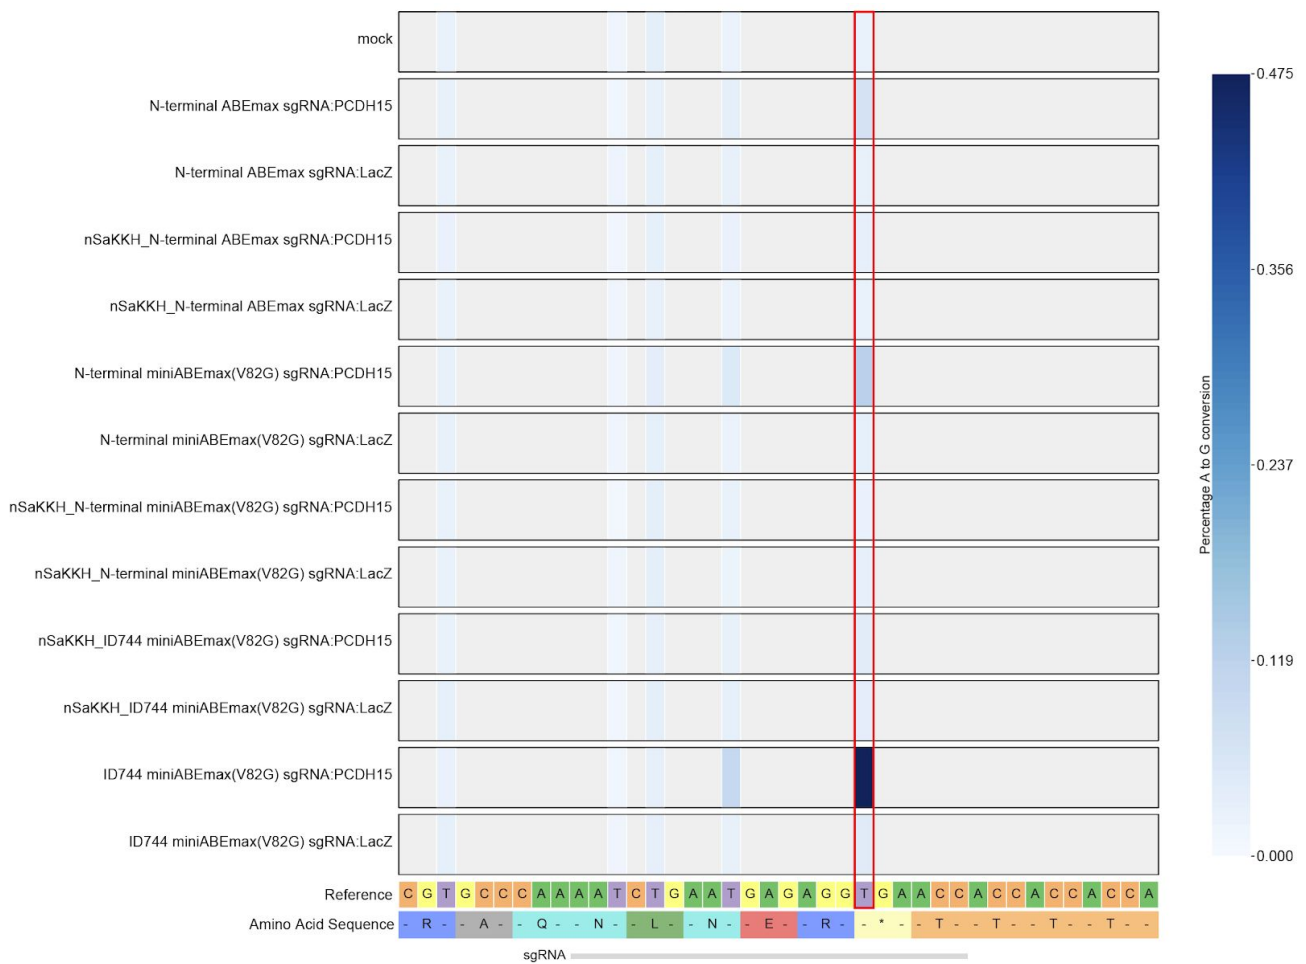

**Supplementary Figure 19.**

**Heatmap showing the incidence of off-target events at several promiscuous RNA transcripts for constructs targeting the *PCDH15* Arg245Ter variant.** Data is generated from targeted MiSeq sequencing averaged across six replicates in an engineered Flp-In TRex 293 cell line expressing the cDNA transcript of *PCDH15*.

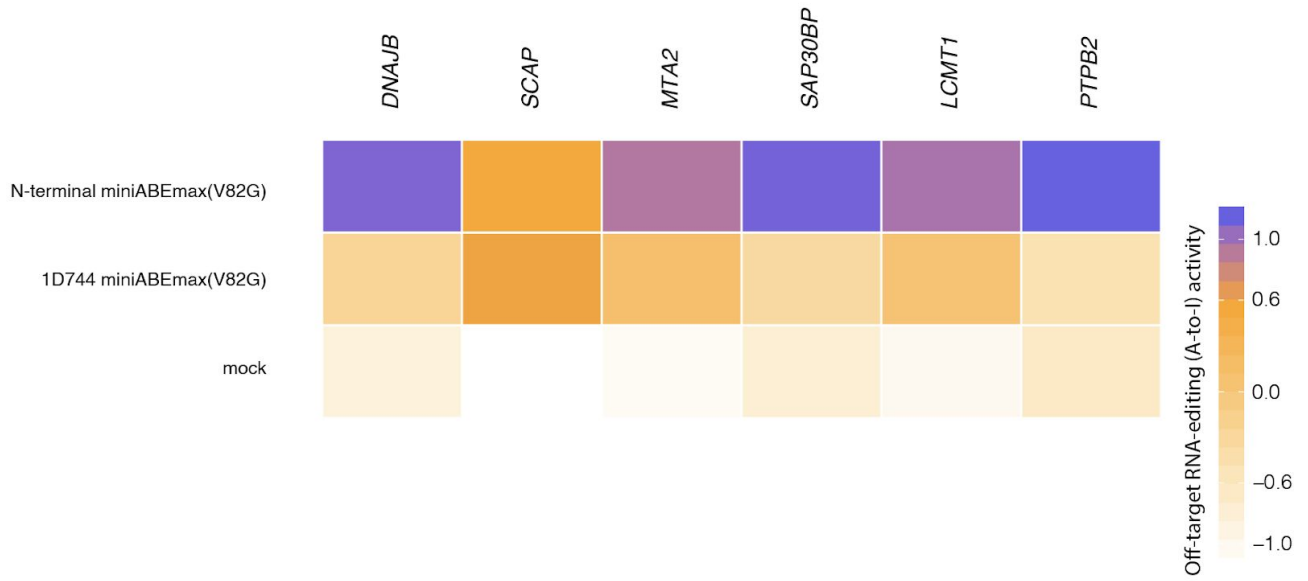

Supplement: 41467_2020_18715_MOESM1_ESM.pdf [file 41467_2020_18715_MOESM1_ESM.pdf]
